# Supplementary material
Source: PubMed Central journal article supplement (PMC7896318)
Supplement: pnas.2015675118.sapp.pdf [file pnas.2015675118.sapp.pdf]

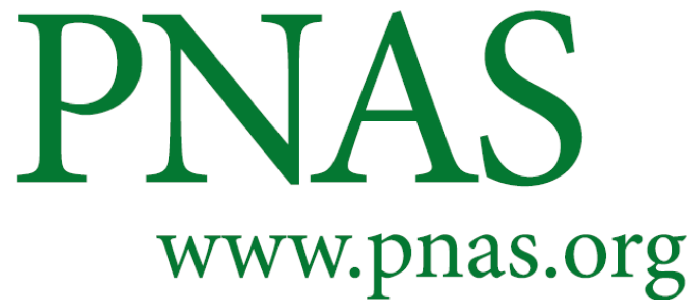

Supplementary Information for

**The Krüppel-like-factor Cabut has cell cycle regulatory properties similar to E2F1**

Peng Zhang<sup>a,b,1</sup>, Alexia J. Katzaroff<sup>c,d,1</sup>, Laura A. Buttitta<sup>d</sup>, Yiqin Ma<sup>a,b</sup>, Huaqi Jiang<sup>d</sup>, Derek W. Nickerson<sup>d</sup>, Jan Inge Øvrebø<sup>a,b</sup> and Bruce A. Edgar<sup>a,b,d,2</sup>

<sup>a</sup>Huntsman Cancer Institute, University of Utah, Salt Lake City, UT 84112;

<sup>b</sup>Department of Oncological Sciences, University of Utah, Salt Lake City, UT 84112;

<sup>c</sup>Molecular and Cellular Biology Program, University of Washington, Seattle, WA 98195;

<sup>d</sup>Division of Basic Sciences, Fred Hutchinson Cancer Research Center, Seattle, WA 98109

<sup>1</sup>P.Z. and A.J.K. contributed equally to this work.

<sup>2</sup>To whom correspondence may be addressed. Email: [bruce.edgar@hci.utah.edu](mailto:bruce.edgar@hci.utah.edu).

**This PDF file includes:**

Supplementary Materials and Methods

Figures S1 to S7

Tables S1 to S6

SI References

## Supplementary Materials and Methods

### Fly strains

*w1118*, *GMR-Gal4* (1), *GMR-Gal4(ey-CFP)* (generated in this study), *PCNA-miniwhite*<sup>+</sup> (generated in this study), *en-Gal4* (from A. Brand), *PCNA-GFP* (2), *FRT<sup>80B</sup> ago<sup>3</sup>* (3), *e2f2<sup>76Q1</sup>* (4), *e2f1<sup>su89</sup>* (5), *e2f1<sup>LA0365</sup>* and *cbt<sup>LA0930</sup>* (from J. Merriam), *UAS-cbt* (6), *hs-flp;act>CD2>Gal4,UAS-GFP* (from F. Pignoni), *hs-flp;tub>CD2>Gal4,UAS-GFP;tub-Gal80<sup>TS</sup>,UAS-Diap1* (7), *ap-Gal4,UAS-GFP;tub-Gal80<sup>ts</sup>* (*ap-Gal4* described in (8)), *UAS-E2f1/DP* (9), *UAS-Stg* (9), *hs-flp,tub-Gal4,UAS-GFP;FRT<sup>40A</sup> tub-Gal80 (MARCM<sup>40A</sup>)* (10), *FRT<sup>42D</sup> Dp<sup>a3</sup>* (11), *e2f1<sup>rM729</sup>* (12), *hs-flp,tub-Gal4,UAS-GFP;;FRT<sup>82B</sup> tub-Gal80 (MARCM<sup>82B</sup>)* (10), *FRT<sup>82B</sup> e2f1<sup>7172</sup>* (12), *P[GawB]cbt[NP5201]* (Kyoto # 104895), *cbt<sup>D41</sup>* and *cbt<sup>D41</sup> FRT<sup>2LR</sup>* (generated in this study), *Sco/Cyo,Δ2-3* (Edgar lab stock), *UAS-cbt<sup>RNAi</sup>* (NIG #4427R-1), *UAS-MED15<sup>RNAi</sup>* (VDRC #21809), *UAS-GFP-E2f1* (13), *esg-Gal4,UAS-GFP;tub-Gal80<sup>ts</sup>* (14), *esg-Gal4* (Edgar lab stock), *EGFP-PCNA* (15), *esg-Gal4,tub-Gal80<sup>ts</sup>,UAS-GFP;UAS-flp, act>CD2>Gal4 (esg<sup>ts</sup> F/O)* (10), *ubi-GFP-E2F1<sub>1-230</sub>,ub-mRFPI-NLS-CycB<sub>1-266</sub>* (FUCCI#28.7) (16), *UAS-dTIEG* (17).

### Immunostaining

Pupae, staged from white pre-pupae (0 hours after puparium formation, 0h APF) at 25°C, were dissected and fixed as described in (7, 18) for 18-44h APF pupae. Pupal cuticle was removed from wings post-fixation. Tissues 18-36h APF were blocked in PBS+0.1%TritonX-100+1%BSA for 1 hour. Tissues 36-44h APF were blocked in PBS+0.3%TritonX-100+1%BSA overnight. Larval discs were dissected and fixed for 30min in 4% paraformaldehyde in PBS for 30min followed by three 20min washes in PBS+0.1%TritonX-100+1%BSA. Wing hinge, notum and antennae were excluded from analyses. EdU labeling was performed on pupal tissues by dissecting tissue in

Ringer's solution and incubating in EdU (10 $\mu$ M) for 60min and then fixed in 4% paraformaldehyde in PBS for 30min. Tissues were then processed according to Click-iT EdU Imaging Kit (Invitrogen C 10338). BrdU labeling was performed by dissecting tissue in Ringer's solution and incubating in BrdU (100 $\mu$ g/mL) for 30min and then fixed in 4% paraformaldehyde in PBS for 30min. Tissues were then incubated in 2N HCl for 30min and neutralized twice with 100mM Borax for five minutes followed by incubation with anti-BrdU antibody. Midgut staining protocol was described in (14). All samples were stained with primary antibodies with the following dilutions: mouse  $\alpha$ -phospho-Histone 3 (Upstate, 1:1,000), rabbit  $\alpha$ -phospho-Histone 3 (Millipore, 1:1,000), rabbit  $\alpha$ -GFP (Molecular Probes, 1:1,000), chicken  $\alpha$ -GFP (Thermo Fisher Scientific, 1:1,000), mouse  $\alpha$ -BrdU (BD Biosciences, 1:100), rabbit  $\alpha$ -CyclinA (from D. Glover, 1:500), rabbit  $\alpha$ -E2F1 (from R. Duronio, 1:500), Guinea pig  $\alpha$ -E2F1 ((13), 1:100), rabbit  $\alpha$ - $\beta$ -galactosidase (Cappel, 1:10,000), mouse  $\alpha$ - $\beta$ -galactosidase (Promega, 1:500), mouse  $\alpha$ -rat CD2 (Serotec, 1:800), rabbit  $\alpha$ -Pdm1 (from X. Yang, 1:100), mouse  $\alpha$ -Prospero (DHSB, 1:50), rabbit  $\alpha$ -DsRed (Clontech Laboratories, 1:500), mouse  $\alpha$ -Diap1 (from B. Hay, 1:100), Appropriate secondary antibodies were Alexa 488, 568, or 633 (Molecular Probes, 1:4,000). Hoescht 33258 (Molecular probes, 1 $\mu$ g/mL) or DAPI (Thermo Fisher Scientific, 1:1000) were used to label nuclei. Confocal images were collected on a Zeiss LSM 510, 780, and Leica SP8 microscopes.

### **Clone cell counts**

Clone cell counts to analyze overexpression effects in proliferating cells were performed as described in (9) using *hs-flp;act>CD2>Gal4* with larvae heat-shocked for 10min at 37°C at 48h AED and dissected 72h later at 120h AED. GFP-positive cells per clone were scored blind on a Leica DMR microscope with greater than 100 clones/genotype were scored. Clone cell counts in pupal tissues were performed as described in (7) using *hs-flp;tub>CD2>Gal4,UAS-GFP;tub-*

*Gal80<sup>ts</sup>,UAS-Diap1*. 0h APF white pre-pupae were heat-shocked for 2min at 37°C and then dissected and fixed between 40-44h APF. GFP-positive cells per clone were scored blind on a Nikon Eclipse TI microscope with greater than 100 clones/genotype scored. The wing margin, hinge and notum were excluded as they have different proliferative properties (7). Clone cell counts to analyze the effect of transgene overexpression in mutant cells were performed using MARCM (19). 2h egg collections were performed and larvae were placed 50 animals/vial. For *e2f1<sup>7172</sup>* clonal experiments larvae were heat-shocked at 72h AED for 45min and dissected 48h later at 120h AED. GFP-positive cells per clone were scored blind on a Nikon Eclipse TI microscope and greater than 100 clones/genotype were scored.

### **Microarrays**

Microarray experiments were performed in tandem with (18) and methods have been described there and in (20). 10 wings from animals expressing either *E2f1/DP* or *cbt* by *ap-Gal4;tub-Gal80<sup>ts</sup>* (or controls) were dissected at the appropriate time points (3<sup>rd</sup> larval instar, 24h APF, and 36h APF). Temperature shifts limited transgene expression to the pupal stages. Expression in 3<sup>rd</sup> instar larvae was equivalent to 24h before dissection of wandering larvae. RNA was isolated in Trizol (Invitrogen) and cleaned by RNaseasy column (Qiagen). cDNA synthesis was performed followed by a single subsequent round of T7-dependent linear RNA amplification using the Message Amp<sup>TM</sup> kit from Ambion (21). Labeling of amplified RNA was performed according to Nimblegen protocols and hybridized to Nimblegen 4-plex 60-mer *Drosophila* expression arrays. To ensure maximum confidence in data reproducibility, hybridizations were performed 4 times with three independently collected biological replicates. Statistically significant changes were determined using a 1.3-fold cutoff by ANOVA (22). Hierarchical clustering was performed using

Genesis (23) and GO enrichment by FatiGO. Correlation coefficients between arrays were determined by centered correlation single linkage.

### **RT-qPCR**

RNA was isolated from 20 pupal wings using Trizol and RNAeasy columns (Qiagen). Equivalent amounts of RNA were used in 40 $\mu$ L cDNA synthesis reactions. PCR products were detected by Sybr-Green (Molecular Probes) and analyzed on a MyIQ iCycler (BioRad). Three (or more) independent biological replicates were used to collect data, and error bars indicate the range of measurements. The amplification efficiency of primers was tested using serial dilutions of control cDNA. All primer sets were designed to span introns to prevent amplification of genomic DNA. All presented data is normalized to amount of mRpL30 mRNA which is present at constant levels throughout pupal wing development (7). RNR-S primer sequences used were FWD: ACATCTTGCGAACGTTGTTG and REV: CGTCCAAGGAAAACATTGCT. All other primer sequences and mRpL30 normalization control have been described in (7).

### **Statistical Analysis**

Statistical analyses were performed using the GraphPad Prism 8. Statistical significance (P values) of experiments were calculated by unpaired two-tailed Student's t-test. Statistical significance was denoted as follows: non-significant (ns)  $P > 0.05$ , \* $P < 0.05$ , \*\* $P < 0.01$ , \*\*\* $P < 0.001$  and \*\*\*\* $P < 0.0001$ .

Figures S1-S7:

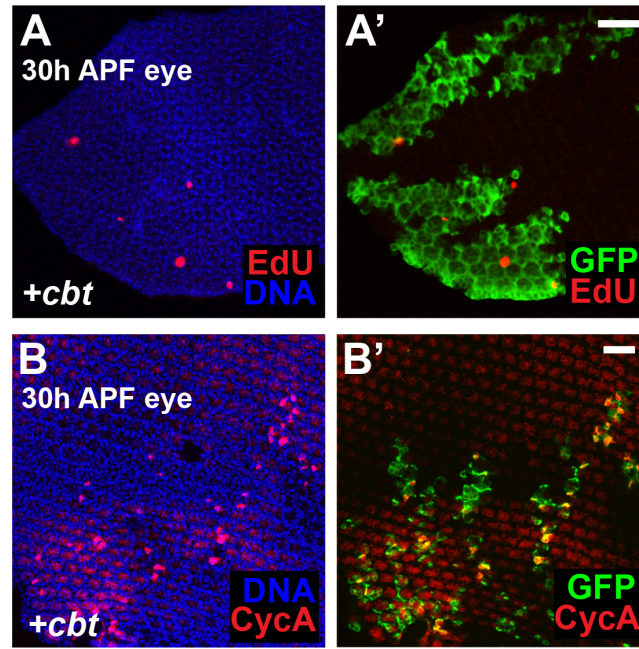

**Figure S1. Cbt causes ectopic cell proliferation in pupal eyes**

(A, B) 30h APF eyes with GFP-positive marked clones expressing *cbt* by *hs-flp;tub>CD2>Gal4;tub-Gal80<sup>ts</sup>*. Cbt induced ectopic DNA replication by EdU incorporation (A, red) and ectopic S and G2 phases by anti-CycA staining (B, red). Nuclei were stained with Hoechst (blue). Scale bars represent 20µm.

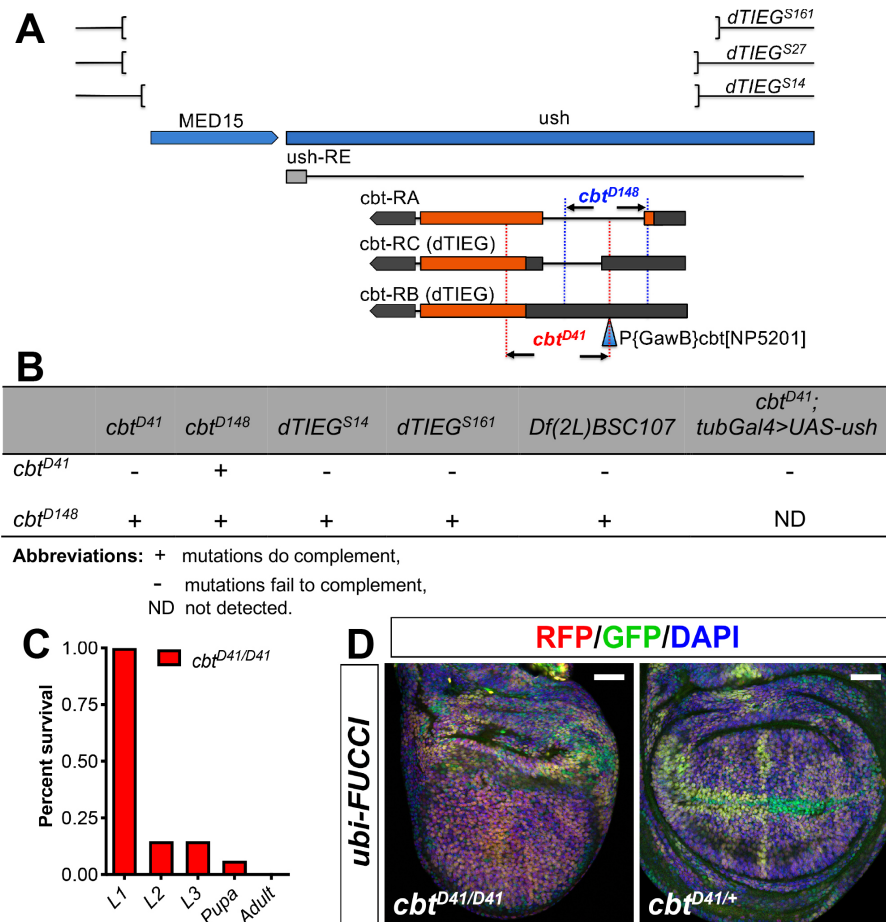

**Figure S2. *cbt* null mutant generation and functional validation**

(A) Scheme showed the *cbt* mutants generated in this study (*cbt<sup>D41</sup>* and *cbt<sup>D148</sup>*) and by others (*dTIEG<sup>S14</sup>*, *dTIEG<sup>S27</sup>*, and *dTIEG<sup>S161</sup>*) (17). Per the sequencing results, *cbt<sup>D41</sup>* did not impair the first intron, but deleted 241nt of the second intron and caused a frameshift of all three isoforms (Cbt-RA, -RB, and -RC). *cbt<sup>D148</sup>* deleted 59nt of the first intron of *cbt*-RA but did not impinge on *cbt*-RB and -RC. (B) Genetic complementation tests indicated that of *cbt<sup>D41</sup>* is a null allele but *cbt<sup>D148</sup>* is not. (C) *cbt<sup>D41</sup>* was balanced with the *CyO-uGFP* balancer. Homozygous *cbt<sup>D41/D41</sup>* larvae (non-GFP 1<sup>st</sup> instar) were collected for a lethal phase test. The lethal phase test showed that most of the homozygous *cbt<sup>D41Dd41</sup>* mutants died at the 2<sup>nd</sup> instar larval stage, and ~5% of them can pass the 3<sup>rd</sup> instar but died in the pupal stage. (D) A combined fly strain “*cbt<sup>D41</sup>; ubi-FUCCI/SM5-TM6B*” was generated. Heterozygous (*Tb<sup>1</sup>*, squat larvae) and homozygous (non-*Tb<sup>1</sup>*) 3<sup>rd</sup> instar larvae were dissected and stained with anti-GFP and anti-RFP antibodies and DAPI. The homozygous 3<sup>rd</sup> instar *cbt<sup>D41Dd41</sup>* larvae have smaller wing imaginal discs with disrupted cell cycle progression. Scale bars represent 40μm.

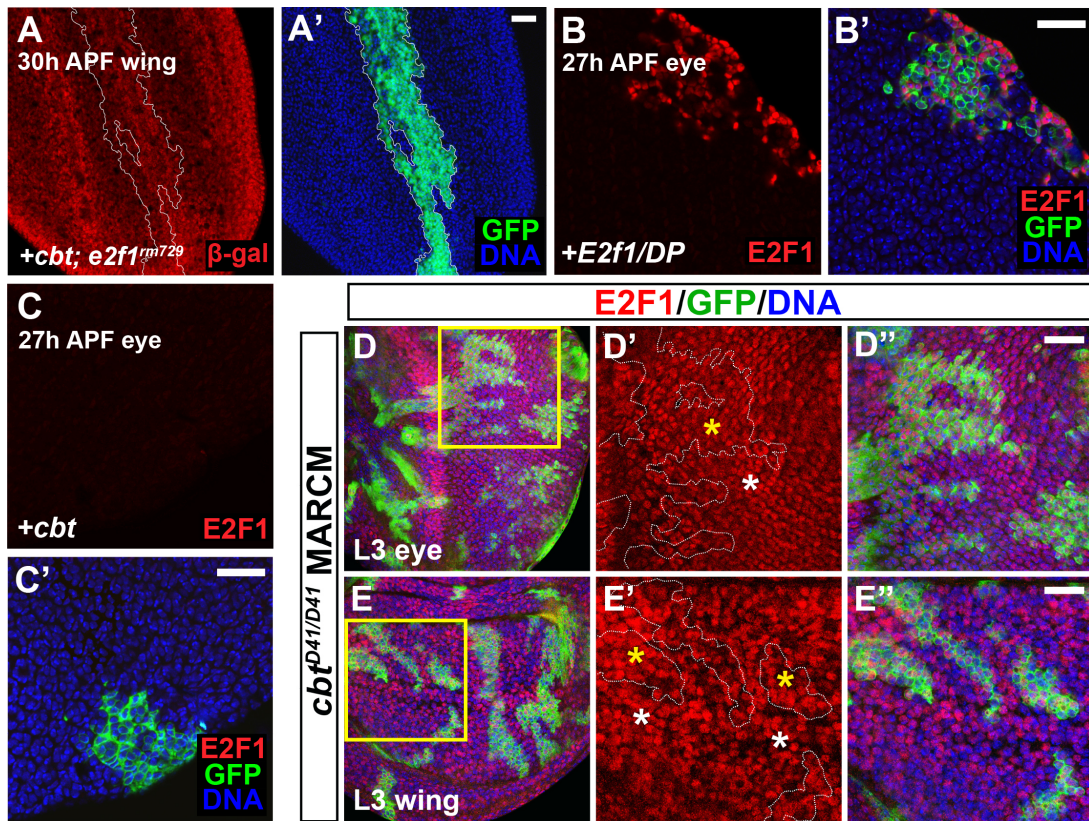

**Figure S3. Cbt does not affect *E2f1* mRNA or protein expression**

(A-A') GFP-marked clones expressing *cbt* were generated between 48h-72h AED by *hs-flp; act>CD2>Gal4* in animals heterozygous for the enhancer trap *e2f1<sup>M729</sup>* allele which contains a LacZ insertion downstream of the *e2f1* promoter. 30h APF wings were stained with anti-GFP and anti- $\beta$ -galactosidase antibodies, and Hoechst 33258. (B-C') GFP marked clones generated by *hs-flp; tub>Gal4; tub-Gal80<sup>ts</sup>* expressing *E2f1/DP* (B-B') or *cbt* (C-C') analyzed at 27h APF in eyes. Expression of *E2f1/DP* strongly increased the level of E2F1 protein by anti-E2F1 antibody (red) staining while *cbt* did not. (D-E'') *cbt<sup>D41/D41</sup>* mutant clones were generated by MARCM system at 48h AED and analyzed in the 3<sup>rd</sup> instar wing (D-D'') and eye (E-E'') discs. The yellow boxes in D and E were enlarged and visualized in D'-D'' and E'-E''. Comparing with the surrounding wild-types areas (indicated by white asterisks), cell clones homozygous for *cbt<sup>D41</sup>* (indicated by yellow asterisks) did not alter E2F1 protein levels. Clones were labeled by GFP. Nuclei were stained with Hoechst (blue). Scale bars represent 20 $\mu$ m.



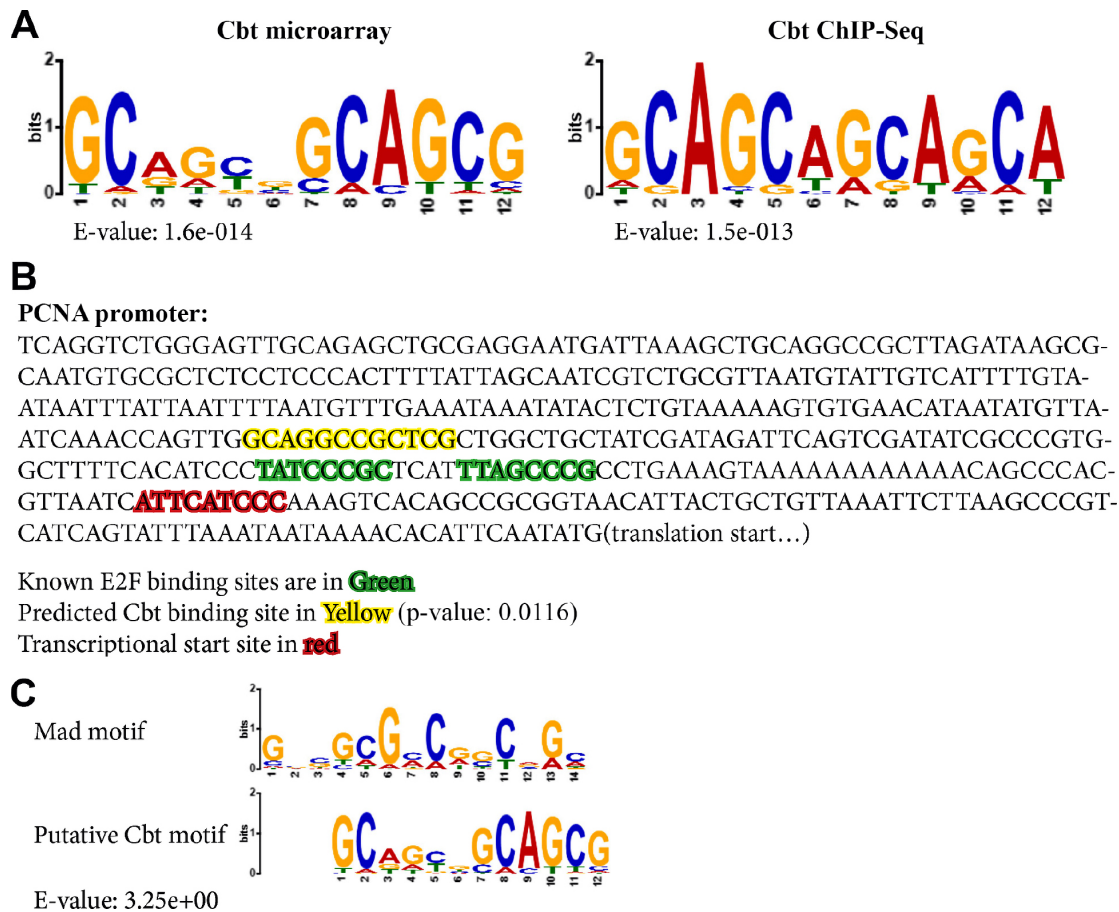

**Figure S4: Motif analysis of Cbt**

(A) *de novo* motif discovery was performed on TSS regions of Cbt target genes from our microarray data (left) and Cbt binding regions from ChIP-seq (modENCODE) using FIMO (MEME suite). A common GCAGYKGCAGCG motif was identified from both datasets, and a similar motif (p-value: 0.0116) is present at PCNA promoter region (B). (C) Comparison with known fly transcriptional factor motifs using TOMTOM revealed that the putative Cbt motif is similar to Mad binding site.

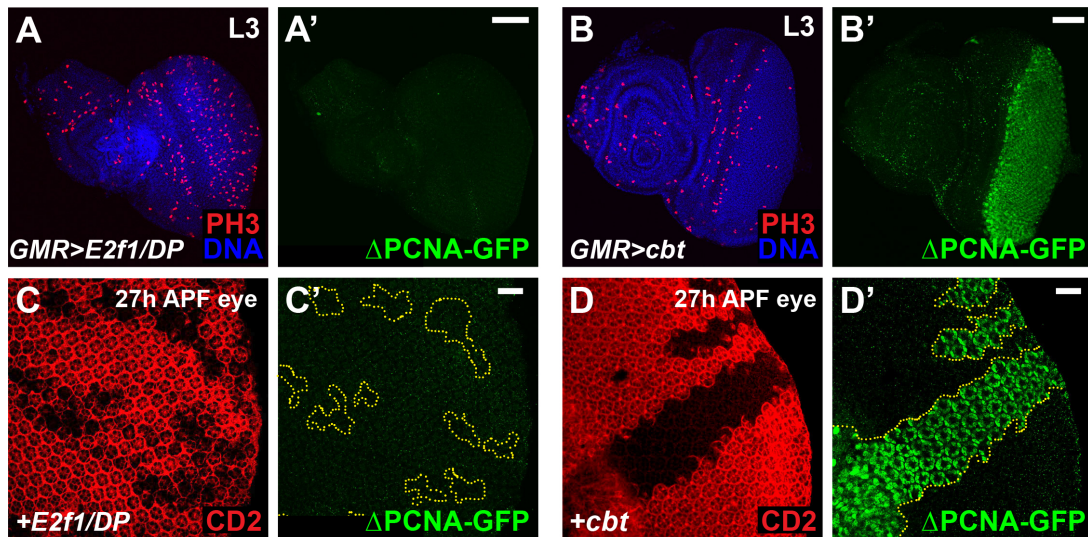

**Figure S5. Cbt activates the *PCNA-GFP* reporter independent of the E2F1 binding sites**

(A, B) *GMR-Gal4* was used to express either *E2f1/DP* (A) or *cbt* (B) in 3<sup>rd</sup> larval instar eye discs. Mitoses were detected by anti-PH3 staining (A, B) and expression of the  $\Delta PCNA-GFP$  reporter (green) was analyzed (A', B'). Nuclei were stained with Hoechst (blue). Scale bars represent 50 $\mu$ m. (C, D) Clones marked by the absence of CD2 (red) expressing either *E2f1/DP* (C) or *cbt* (D) were generated by *hs-flp;act>CD2>Gal4* and examined at 27h APF in eyes for  $\Delta PCNA-GFP$  expression. (C) E2F1/DP did not activate the  $\Delta PCNA-GFP$  reporter. (D) Cbt strongly activated the  $\Delta PCNA-GFP$  reporter. Scale bars represent 20 $\mu$ m.

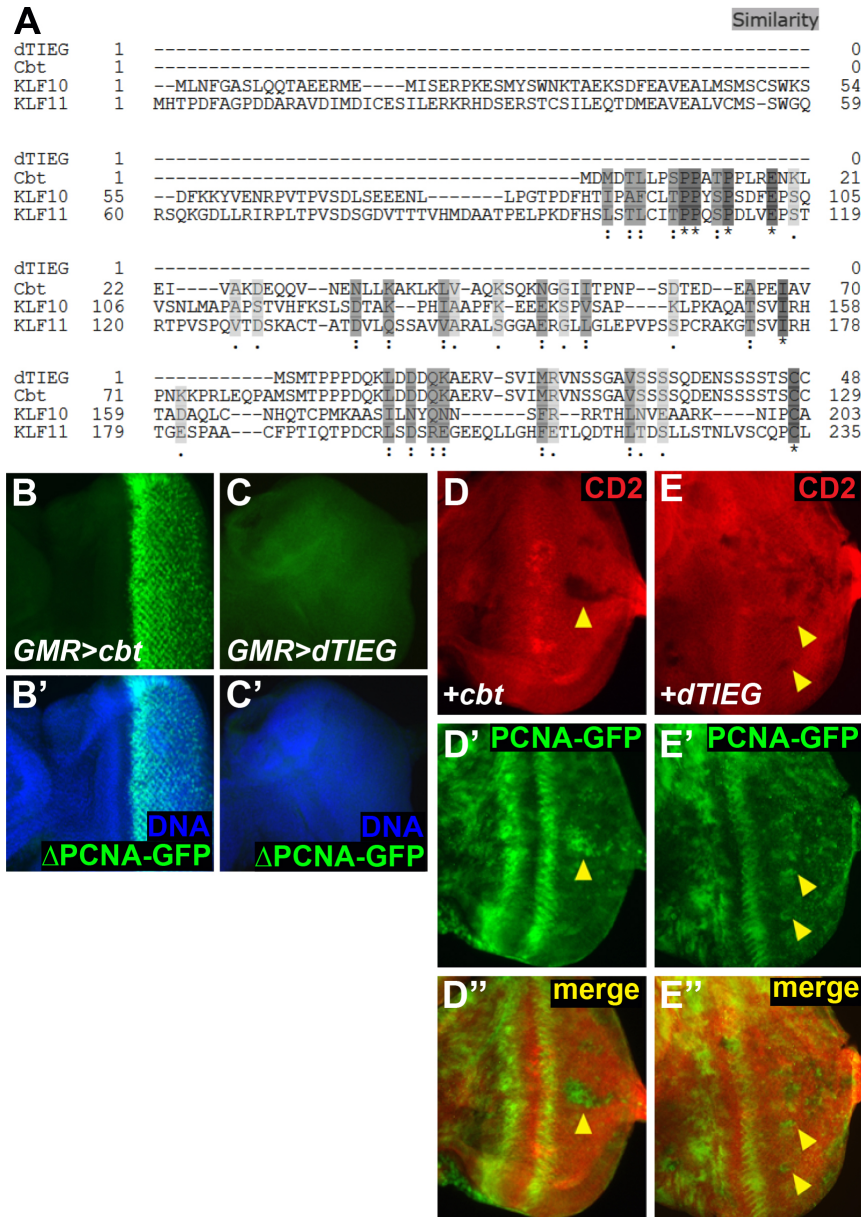

**Figure S6. The N-terminus of Cbt is required for the activation of  $\Delta PCNA-GFP$  but is dispensable for the activation of  $PCNA-GFP$**

(A) Sequence alignments of the N-terminus of *Drosophila* dTIEG (the shorter isoform of Cbt), Cbt, and human KLF10 and KLF11 with Uniport (<https://www.uniprot.org/align/>), followed by manual refinement. Fully conserved amino acids are shaded with dark grey and marked with “\*” (asterisk). Strongly similar amino acids with scoring > 0.5 in the Gonnet PAM 250 matrix are shaded with medium grey and marked with “:” (colon). Weakly similar amino acids with scoring  $\leq 0.5$  and  $> 0$  in the Gonnet PAM 250 matrix are shaded with light grey and marked with “.” (period). All unmarked amino acids have a score of 0.0 in the Gonnet PAM 250 matrix. (B-C’)

*GMR-Gal4* was used to express either *cbt* (B-B') or *dTIEG* (C-C') in 3<sup>rd</sup> larval instar eye discs. Overexpression of *cbt* (B), rather than *dTIEG* (C), activates the  $\Delta$ *PCNA-GFP* reporter. Nuclei were stained with Hoechst (blue). (D-E'') Clones marked by the absence of CD2 (red) expressing either *cbt* (D-D'') or *dTIEG* (E-E'') were generated by *hs-flp;act>CD2>Gal4*. Arrowheads indicate the clone areas that have upregulated *PCNA-GFP*. Both *cbt* (D') and *dTIEG* (E') could activate the *PCNA-GFP* reporter.

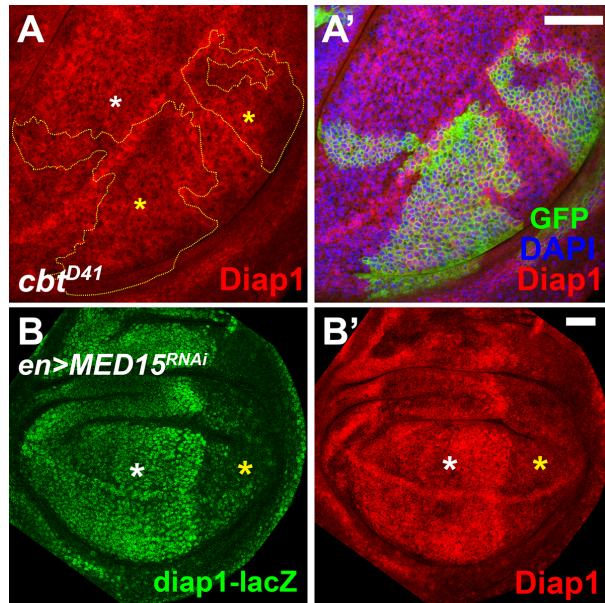

**Figure S7. MED15 but not Cbt is required for Yki activity**

(A-A') *cbt<sup>D41/D41</sup>* mutant clones were generated by MARCM system at 48h AED and analyzed in the 3<sup>rd</sup> instar wing discs. Samples were stained with anti-GFP and anti-Diap1 antibodies and DAPI. Yellow dotted lines marked the clone areas. Yellow asterisks (A) indicates the *Diap1* expression inside of *cbt<sup>D41/D41</sup>* mutant clones, while the white asterisk (A) indicates the *Diap1* expression in surrounding wild-type cells. (B) Knockdown of *MED15* in the posterior compartment of 3<sup>rd</sup> instar wing disc was driven by *en-Gal4*. The *Diap1-LacZ* reporter (green) and anti-Diap1 staining (red) were applied to indicate Yki activity. Yellow asterisks in (B and B') indicated the decreasing of *Diap1-lacZ* and the endogenous Diap1 protein levels. White asterisks in (B and B') indicated the normal levels of *Diap1-lacZ* and the endogenous Diap1 in the anterior compartment. Scale bars represent 30µm.

**Tables S1-S6:**

**Table S1. Positive hits from PCNA-miniwhite<sup>+</sup> screen**

| EP Line | Predicted Overexpressed Gene | Function/Domains                 |
|---------|------------------------------|----------------------------------|
| LA0030  | <i>CG7239</i>                | Zinc finger transcription factor |
| LA0035  | <i>CG10431</i>               | Zinc finger transcription factor |
| LA0095  | <i>CG5789</i>                | ATP-binding transporter          |
| LA0202  | SH3PX1                       | Protein binding                  |
| LA0316  | <i>lola</i>                  | Zinc finger transcription factor |
| LA0349  | <i>cycE</i>                  | G1 Cyclin                        |
| LA0365  | <i>E2f1</i>                  | Transcription factor             |
| LA0376  | NK7.1                        | Homeobox transcription factor    |
| LA0390  | <i>mesr4</i>                 | Zinc finger transcription factor |
| LA0411  | <i>Hsc70CB</i>               | ATPase, chaperone                |
| LA0622  | <i>CG12768</i>               | Unknown                          |
| LA0648  | <i>dan</i>                   | Homeobox transcription factor    |
| LA0718  | <i>sec23</i>                 | GTPase activator                 |
| LA0870  | dACK                         | Tyrosine kinase                  |
| LA0930  | <i>cabut</i>                 | Zinc finger transcription factor |

**Table S2. Transcriptional targets of Cbt in pupal wing**

A negative number for the "Log<sub>2</sub> FC" means it increased upon *cbt* overexpression, and a positive number means the gene decreased under *cbt* overexpression. Cutoff: log<sub>2</sub> ± 0.4 compared to controls, P<0.05.

| Transcript_ID      | Gene_ID     | Gene_Name | Log2 FC of (+Cbt 24h APF) | Log2 FC of (+Cbt 36h APF) | P.value. adj.Cbt 24h APF | P.value. adj. Cbt 36h APF |
|--------------------|-------------|-----------|---------------------------|---------------------------|--------------------------|---------------------------|
| <b>FBtr0075108</b> | FBgn0036800 | CG6897    | -2.45                     | -2.73                     | 0.00                     | 0.00                      |
| <b>FBtr0073286</b> | FBgn0052251 | CG32251   | -2.57                     | -1.59                     | 0.00                     | 0.00                      |
| <b>FBtr0081258</b> | FBgn0027949 | msb11     | -2.31                     | -2.72                     | 0.00                     | 0.00                      |
| <b>FBtr0079357</b> | FBgn0031878 | sip2      | -3.25                     | -3.57                     | 0.00                     | 0.00                      |
| <b>FBtr0077113</b> | FBgn0035640 | mad2      | -2.09                     | -1.65                     | 0.00                     | 0.00                      |
| <b>FBtr0076771</b> | FBgn0003041 | pbl       | -2.43                     | -1.71                     | 0.00                     | 0.00                      |
| <b>FBtr0073227</b> | FBgn0011692 | pav       | -3.13                     | -3.01                     | 0.00                     | 0.00                      |
| <b>FBtr0100318</b> | FBgn0003124 | polo      | -1.95                     | -3.16                     | 0.00                     | 0.00                      |

|                    |             |                     |       |       |      |      |
|--------------------|-------------|---------------------|-------|-------|------|------|
| <b>FBtr0074839</b> | FBgn0003124 | polo                | -1.76 | -3.06 | 0.00 | 0.00 |
| <b>FBtr0075970</b> | FBgn0002466 | sti                 | -3.36 | -3.11 | 0.00 | 0.00 |
| <b>FBtr0083586</b> | FBgn0038608 | CG7670              | -2.90 | -3.37 | 0.00 | 0.00 |
| <b>FBtr0080059</b> | FBgn0011703 | RnrL                | -2.13 | -1.97 | 0.00 | 0.00 |
| <b>FBtr0088046</b> | FBgn0011704 | RnrS                | -2.10 | -2.56 | 0.00 | 0.00 |
| <b>FBtr0076603</b> | FBgn0011762 | DNApol- $\alpha$ 50 | -2.59 | -1.95 | 0.00 | 0.00 |
| <b>FBtr0077081</b> | FBgn0035644 | Pole2               | -2.51 | -2.84 | 0.00 | 0.00 |
| <b>FBtr0082866</b> | FBgn0015270 | Orc2                | -2.75 | -2.56 | 0.00 | 0.00 |
| <b>FBtr0086307</b> | FBgn0005655 | PCNA/mus209         | -2.41 | -3.27 | 0.00 | 0.00 |
| <b>FBtr0081827</b> | FBgn0014861 | Mcm2                | -1.91 | -1.28 | 0.00 | 0.00 |
| <b>FBtr0081438</b> | FBgn0032906 | CG9273              | -1.36 | -1.72 | 0.00 | 0.00 |
| <b>FBtr0077679</b> | FBgn0024920 | Ts                  | -2.65 | -3.36 | 0.00 | 0.00 |
| <b>FBtr0086881</b> | FBgn0003545 | sub                 | -4.12 | -3.85 | 0.00 | 0.00 |
| <b>FBtr0072733</b> | FBgn0004378 | Klp61F              | -3.29 | -3.69 | 0.00 | 0.00 |
| <b>FBtr0084692</b> | FBgn0000140 | asp                 | -4.20 | -2.75 | 0.00 | 0.00 |
| <b>FBtr0080215</b> | FBgn0040232 | cmet                | -4.19 | -2.98 | 0.00 | 0.00 |
| <b>FBtr0080180</b> | FBgn0024227 | ial                 | -1.80 | -1.83 | 0.00 | 0.00 |
| <b>FBtr0070258</b> | FBgn0026871 | CG14781             | -3.56 | -2.54 | 0.00 | 0.00 |
| <b>FBtr0075363</b> | FBgn0027500 | CG17286             | -2.56 | -1.42 | 0.00 | 0.00 |
| <b>FBtr0079424</b> | FBgn0031886 | CG8902              | -2.46 | 1.05  | 0.00 | 0.00 |
| <b>FBtr0088961</b> | FBgn0033156 | Incenp              | -2.64 | -3.29 | 0.00 | 0.00 |
| <b>FBtr0089584</b> | FBgn0036689 | CG7730              | -3.17 | -1.49 | 0.00 | 0.00 |
| <b>FBtr0071616</b> | FBgn0034614 | CG9752              | -2.18 | -2.41 | 0.00 | 0.00 |
| <b>FBtr0087641</b> | FBgn0033881 | RacGAP50C           | -3.88 | -3.99 | 0.00 | 0.00 |
| <b>FBtr0075863</b> | FBgn0036354 | CG10191             | -2.54 | -2.85 | 0.00 | 0.00 |
| <b>FBtr0083931</b> | FBgn0038821 | CG17267             | -1.95 | -1.76 | 0.00 | 0.00 |
| <b>FBtr0082203</b> | FBgn0037781 | CG12812             | -2.09 | -1.01 | 0.00 | 0.00 |
| <b>FBtr0075056</b> | FBgn0036815 | l(3)neo26           | -1.50 | -2.45 | 0.00 | 0.00 |
| <b>FBtr0075057</b> | FBgn0036815 | l(3)neo26           | -2.36 | -2.03 | 0.00 | 0.00 |
| <b>FBtr0086768</b> | FBgn0003022 | Ote                 | -1.12 | -0.64 | 0.00 | 0.00 |
| <b>FBtr0083183</b> | FBgn0003483 | spn-E               | -1.58 | -1.40 | 0.00 | 0.00 |
| <b>FBtr0076585</b> | FBgn0020633 | Mcm7                | -2.30 | -2.29 | 0.00 | 0.00 |
| <b>FBtr0082279</b> | FBgn0017577 | Mcm5                | -3.04 | -3.71 | 0.00 | 0.00 |
| <b>FBtr0079799</b> | FBgn0010314 | Cks30A              | -3.39 | -3.10 | 0.00 | 0.00 |
| <b>FBtr0082483</b> | FBgn0000147 | aur                 | -2.59 | -2.22 | 0.00 | 0.00 |
| <b>FBtr0086032</b> | FBgn0025458 | Bub1                | -2.56 | -2.01 | 0.00 | 0.00 |
| <b>FBtr0075181</b> | FBgn0036738 | CG7542              | 3.15  | 2.96  | 0.00 | 0.00 |
| <b>FBtr0071698</b> | FBgn0050288 | CG30288             | 4.78  | 5.06  | 0.00 | 0.00 |
| <b>FBtr0083290</b> | FBgn0038431 | CG10405             | 2.40  | 3.78  | 0.00 | 0.00 |
| <b>FBtr0073806</b> | FBgn0030501 | BthD                | -4.02 | -4.35 | 0.00 | 0.00 |
| <b>FBtr0076885</b> | FBgn0035761 | RhoGEF4             | -3.58 | -3.06 | 0.00 | 0.00 |
| <b>FBtr0081095</b> | FBgn0032698 | CG10336             | -2.31 | -1.88 | 0.00 | 0.00 |
| <b>FBtr0078090</b> | FBgn0031252 | CG13690             | -3.38 | -3.23 | 0.00 | 0.00 |
| <b>FBtr0083133</b> | FBgn0045035 | tefu                | -1.64 | -0.95 | 0.00 | 0.00 |

|                    |             |                      |       |       |      |      |
|--------------------|-------------|----------------------|-------|-------|------|------|
| <b>FBtr0084728</b> | FBgn0015625 | CycB3                | -1.58 | -1.81 | 0.00 | 0.00 |
| <b>FBtr0081697</b> | FBgn0024912 | agt                  | -1.08 | -0.96 | 0.00 | 0.00 |
| <b>FBtr0087461</b> | FBgn0027783 | SMC2                 | -1.67 | -1.06 | 0.00 | 0.00 |
| <b>FBtr0070182</b> | FBgn0026143 | CDC45L               | -1.08 | -0.60 | 0.00 | 0.00 |
| <b>FBtr0086787</b> | FBgn0034299 | CG5757               | -1.77 | -1.19 | 0.00 | 0.00 |
| <b>FBtr0082083</b> | FBgn0028997 | nmdyn-D7             | -1.39 | -1.14 | 0.00 | 0.00 |
| <b>FBtr0073468</b> | FBgn0026268 | antdh                | 3.30  | 4.37  | 0.00 | 0.00 |
| <b>FBtr0077125</b> | FBgn0035627 | Sse                  | -2.19 | -1.78 | 0.00 | 0.00 |
| <b>FBtr0080935</b> | FBgn0015391 | glu                  | -1.32 | -0.75 | 0.00 | 0.00 |
| <b>FBtr0085534</b> | FBgn0002924 | ncd                  | -1.77 | -1.58 | 0.00 | 0.00 |
| <b>FBtr0086025</b> | FBgn0033054 | CG14591              | 1.75  | 1.30  | 0.00 | 0.00 |
| <b>FBtr0081449</b> | FBgn0032896 | CG14400              | 2.71  | 3.06  | 0.00 | 0.00 |
| <b>FBtr0071697</b> | FBgn0050289 | CG30289              | 2.91  | 3.57  | 0.00 | 0.00 |
| <b>FBtr0070294</b> | FBgn0025382 | Rab27                | -2.24 | -2.67 | 0.00 | 0.00 |
| <b>FBtr0084556</b> | FBgn0026257 | cav                  | -1.23 | -0.77 | 0.00 | 0.00 |
| <b>FBtr0073410</b> | FBgn0030241 | feo                  | -1.79 | -1.52 | 0.00 | 0.00 |
| <b>FBtr0085119</b> | FBgn0005696 | DNAPol- $\alpha$ 73  | -1.89 | -1.82 | 0.00 | 0.00 |
| <b>FBtr0079320</b> | FBgn0000351 | cort                 | -1.51 | -0.78 | 0.00 | 0.01 |
| <b>FBtr0074876</b> | FBgn0036907 | CG8533               | 1.16  | 1.84  | 0.00 | 0.00 |
| <b>FBtr0084323</b> | FBgn0039018 | CG4771               | -2.10 | -1.26 | 0.00 | 0.00 |
| <b>FBtr0084665</b> | FBgn0051125 | CG31125              | -1.75 | -1.62 | 0.00 | 0.00 |
| <b>FBtr0074007</b> | FBgn0015926 | dah                  | -2.31 | -2.33 | 0.00 | 0.00 |
| <b>FBtr0084408</b> | FBgn0020756 | DNAPol-<br>epsilon   | -2.20 | -1.53 | 0.00 | 0.00 |
| <b>FBtr0075497</b> | FBgn0036565 | CG5235               | -1.85 | -2.10 | 0.00 | 0.00 |
| <b>FBtr0072678</b> | FBgn0035209 | CG13914              | -3.04 | -1.98 | 0.00 | 0.00 |
| <b>FBtr0072237</b> | FBgn0003401 | shu                  | -1.90 | -1.73 | 0.00 | 0.00 |
| <b>FBtr0084115</b> | FBgn0004493 | DNAPol- $\alpha$ 180 | -1.85 | -1.35 | 0.00 | 0.00 |
| <b>FBtr0085795</b> | FBgn0003268 | rod                  | -1.89 | -1.47 | 0.00 | 0.00 |
| <b>FBtr0084558</b> | FBgn0026257 | cav                  | -1.29 | -0.75 | 0.00 | 0.01 |
| <b>FBtr0081475</b> | FBgn0032929 | Mcm10                | -1.83 | -1.36 | 0.00 | 0.00 |
| <b>FBtr0088675</b> | FBgn0033354 | CG13745              | -2.07 | -0.93 | 0.00 | 0.04 |
| <b>FBtr0085777</b> | FBgn0061476 | zwilch               | -1.46 | -1.44 | 0.00 | 0.00 |
| <b>FBtr0088482</b> | FBgn0023180 | Orc6                 | -1.74 | -0.99 | 0.00 | 0.01 |
| <b>FBtr0078241</b> | FBgn0011425 | DNAPrim              | -1.26 | -0.62 | 0.00 | 0.03 |
| <b>FBtr0088222</b> | FBgn0033549 | CG12936              | -1.73 | -1.56 | 0.00 | 0.00 |
| <b>FBtr0073264</b> | FBgn0015287 | RfC40                | -0.77 | -0.61 | 0.00 | 0.00 |
| <b>FBtr0084975</b> | FBgn0039403 | Sld5                 | -1.33 | -0.76 | 0.00 | 0.01 |
| <b>FBtr0072066</b> | FBgn0015903 | apt                  | -1.06 | -0.65 | 0.00 | 0.01 |
| <b>FBtr0077678</b> | FBgn0004584 | Rrp1                 | -1.24 | -0.98 | 0.00 | 0.00 |
| <b>FBtr0080833</b> | FBgn0001086 | fzy                  | -1.43 | -1.84 | 0.00 | 0.00 |
| <b>FBtr0085265</b> | FBgn0039563 | CG4951               | -0.91 | 0.45  | 0.00 | 0.03 |
| <b>FBtr0074809</b> | FBgn0031070 | CG12702              | -2.24 | -1.42 | 0.00 | 0.01 |
| <b>FBtr0005673</b> | FBgn0002887 | mus201               | -0.92 | -0.79 | 0.00 | 0.00 |
| <b>FBtr0087387</b> | FBgn0000996 | dup                  | -1.44 | -1.03 | 0.00 | 0.00 |



|                    |             |          |       |       |      |      |
|--------------------|-------------|----------|-------|-------|------|------|
| <b>FBtr0071911</b> | FBgn0000405 | CycB     | -1.71 | -1.60 | 0.00 | 0.00 |
| <b>FBtr0082690</b> | FBgn0040494 | CG7242   | -1.11 | -1.51 | 0.00 | 0.00 |
| <b>FBtr0074998</b> | FBgn0023395 | Chd3     | -2.06 | -1.87 | 0.00 | 0.00 |
| <b>FBtr0070293</b> | FBgn0025382 | Rab27    | -1.45 | -1.55 | 0.00 | 0.00 |
| <b>FBtr0081867</b> | FBgn0010173 | RpA-70   | -0.71 | -0.90 | 0.00 | 0.00 |
| <b>FBtr0088310</b> | FBgn0033526 | Caf1-105 | -1.04 | -0.73 | 0.00 | 0.00 |
| <b>FBtr0085414</b> | FBgn0039638 | CG11881  | -1.46 | -1.24 | 0.00 | 0.00 |
| <b>FBtr0073850</b> | FBgn0030500 | CG9938   | -2.08 | -1.18 | 0.00 | 0.03 |
| <b>FBtr0080225</b> | FBgn0028700 | RfC38    | -0.58 | -0.46 | 0.00 | 0.00 |
| <b>FBtr0072132</b> | FBgn0034922 | CG5602   | -1.62 | -0.86 | 0.00 | 0.04 |
| <b>FBtr0075130</b> | FBgn0015946 | grim     | -1.26 | -0.86 | 0.00 | 0.01 |
| <b>FBtr0079817</b> | FBgn0032105 | Borr     | -1.00 | -1.25 | 0.00 | 0.00 |
| <b>FBtr0088469</b> | FBgn0010316 | dap      | -0.76 | -0.84 | 0.00 | 0.00 |
| <b>FBtr0082086</b> | FBgn0016792 | dmt      | -0.92 | -0.71 | 0.00 | 0.00 |
| <b>FBtr0088685</b> | FBgn0027513 | CG8262   | -1.05 | -0.87 | 0.00 | 0.00 |
| <b>FBtr0083738</b> | FBgn0038695 | CG14280  | -1.12 | -0.70 | 0.00 | 0.02 |
| <b>FBtr0085047</b> | FBgn0039449 | CG6425   | -0.94 | -1.05 | 0.00 | 0.00 |
| <b>FBtr0085095</b> | FBgn0027889 | ball     | -1.11 | -0.70 | 0.00 | 0.02 |
| <b>FBtr0083478</b> | FBgn0000063 | ald      | -1.15 | -0.81 | 0.00 | 0.01 |
| <b>FBtr0071015</b> | FBgn0029937 | CG8300   | -0.58 | -0.51 | 0.00 | 0.00 |
| <b>FBtr0083835</b> | FBgn0038772 | CG4973   | -0.73 | -0.60 | 0.00 | 0.00 |
| <b>FBtr0071912</b> | FBgn0000405 | CycB     | -1.36 | -1.48 | 0.00 | 0.00 |
| <b>FBtr0078373</b> | FBgn0052438 | Smc5     | -0.75 | -0.47 | 0.00 | 0.03 |
| <b>FBtr0082385</b> | FBgn0011774 | Irbp     | -0.94 | -0.99 | 0.00 | 0.00 |
| <b>FBtr0087655</b> | FBgn0033835 | IM10     | 1.16  | 2.43  | 0.00 | 0.00 |
| <b>FBtr0082386</b> | FBgn0037894 | Ranbp9   | -1.20 | -1.23 | 0.00 | 0.00 |
| <b>FBtr0076019</b> | FBgn0036263 | thoc6    | -0.66 | -0.54 | 0.00 | 0.00 |
| <b>FBtr0081898</b> | FBgn0051453 | CG31453  | -0.77 | -0.83 | 0.00 | 0.00 |
| <b>FBtr0077375</b> | FBgn0031617 | CG15635  | 1.60  | 1.96  | 0.00 | 0.00 |
| <b>FBtr0082933</b> | FBgn0003480 | spn-B    | -1.09 | -0.79 | 0.00 | 0.01 |
| <b>FBtr0073655</b> | FBgn0030407 | CG2543   | -0.55 | -1.03 | 0.00 | 0.00 |
| <b>FBtr0084491</b> | FBgn0039125 | CG5857   | -0.84 | -0.59 | 0.00 | 0.02 |
| <b>FBtr0083408</b> | FBgn0038489 | CG12265  | -0.81 | -0.83 | 0.00 | 0.00 |
| <b>FBtr0076075</b> | FBgn0000404 | CycA     | -0.77 | -1.35 | 0.00 | 0.00 |
| <b>FBtr0077446</b> | FBgn0011603 | ine      | 1.25  | 1.40  | 0.00 | 0.00 |
| <b>FBtr0072865</b> | FBgn0002183 | dre4     | -0.85 | -0.75 | 0.00 | 0.00 |
| <b>FBtr0088790</b> | FBgn0011659 | Mlh1     | -0.81 | -0.54 | 0.00 | 0.04 |
| <b>FBtr0074074</b> | FBgn0030646 | CG9203   | -0.94 | -0.93 | 0.00 | 0.00 |
| <b>FBtr0082304</b> | FBgn0037834 | Art1     | -0.49 | -0.68 | 0.00 | 0.00 |
| <b>FBtr0072856</b> | FBgn0002872 | mu2      | -0.79 | -0.61 | 0.00 | 0.02 |
| <b>FBtr0083921</b> | FBgn0004107 | cdc2c    | -1.06 | -1.20 | 0.00 | 0.00 |
| <b>FBtr0083922</b> | FBgn0004107 | cdc2c    | -0.75 | -1.18 | 0.00 | 0.00 |
| <b>FBtr0081934</b> | FBgn0037633 | CG9839   | -0.78 | -0.68 | 0.00 | 0.01 |
| <b>FBtr0079319</b> | FBgn0031848 | CG11329  | -1.00 | -1.30 | 0.00 | 0.00 |

|                    |             |            |       |       |      |      |
|--------------------|-------------|------------|-------|-------|------|------|
| <b>FBtr0088911</b> | FBgn0004243 | scra       | -0.99 | -1.59 | 0.00 | 0.00 |
| <b>FBtr0086750</b> | FBgn0034314 | CG5140     | -0.69 | -0.49 | 0.00 | 0.04 |
| <b>FBtr0085796</b> | FBgn0039854 | CG1635     | 0.73  | 1.12  | 0.00 | 0.00 |
| <b>FBtr0075960</b> | FBgn0036297 | CG14121    | -0.81 | -1.04 | 0.00 | 0.00 |
| <b>FBtr0086277</b> | FBgn0034495 | CG11788    | -0.65 | -0.57 | 0.01 | 0.02 |
| <b>FBtr0087388</b> | FBgn0011660 | Pms2       | -0.86 | -0.84 | 0.01 | 0.01 |
| <b>FBtr0070146</b> | FBgn0015799 | Rbf        | -0.63 | -0.47 | 0.01 | 0.05 |
| <b>FBtr0075095</b> | FBgn0040322 | GNBP2      | 0.58  | 0.72  | 0.01 | 0.00 |
| <b>FBtr0081287</b> | FBgn0003732 | Top2       | -0.64 | -0.49 | 0.01 | 0.05 |
| <b>FBtr0086535</b> | FBgn0034447 | CG7744     | -0.86 | -0.73 | 0.01 | 0.03 |
| <b>FBtr0080930</b> | FBgn0022213 | Cas        | -0.59 | -0.52 | 0.01 | 0.02 |
| <b>FBtr0078489</b> | FBgn0037141 | DNApol-eta | -0.96 | -0.78 | 0.01 | 0.04 |
| <b>FBtr0071414</b> | FBgn0030170 | CG2990     | -1.10 | -0.95 | 0.01 | 0.03 |
| <b>FBtr0073278</b> | FBgn0016013 | Faa        | 0.46  | 0.74  | 0.01 | 0.00 |
| <b>FBtr0073541</b> | FBgn0027259 | l(1)G0237  | -0.80 | -0.78 | 0.02 | 0.02 |
| <b>FBtr0070762</b> | FBgn0024332 | Mcm3       | -1.15 | -1.32 | 0.02 | 0.00 |
| <b>FBtr0085267</b> | FBgn0039559 | Mes-4      | -0.64 | -0.61 | 0.02 | 0.02 |
| <b>FBtr0081488</b> | FBgn0032934 | CG8679     | -0.72 | -0.61 | 0.02 | 0.05 |
| <b>FBtr0083935</b> | FBgn0038820 | CG4000     | -1.20 | -4.43 | 0.02 | 0.00 |
| <b>FBtr0074222</b> | FBgn0027521 | CG3679     | -0.90 | -0.87 | 0.02 | 0.02 |
| <b>FBtr0086305</b> | FBgn0034494 | CG10444    | -0.59 | -0.76 | 0.02 | 0.00 |
| <b>FBtr0070586</b> | FBgn0029672 | CG2875     | -0.44 | -0.52 | 0.03 | 0.01 |
| <b>FBtr0075965</b> | FBgn0036301 | CG4069     | -0.48 | -0.60 | 0.04 | 0.01 |
| <b>FBtr0079044</b> | FBgn0053113 | Rtnl1      | -0.75 | -0.80 | 0.04 | 0.03 |
| <b>FBtr0077074</b> | FBgn0002638 | Bj1        | -0.68 | -0.73 | 0.04 | 0.03 |
| <b>FBtr0071934</b> | FBgn0040091 | Ugt58Fa    | -0.42 | -0.85 | 0.05 | 0.00 |
| <b>FBtr0078688</b> | FBgn0037338 | Snm1       | -0.50 | -0.75 | 0.05 | 0.00 |
| <b>FBtr0076499</b> | FBgn0004379 | Klp67A     | -3.00 | -2.12 | 0.00 | 0.00 |
| <b>FBtr0085157</b> | FBgn0039504 | CG14260    | -1.68 | -0.68 | 0.00 | 0.04 |
| <b>FBtr0078255</b> | FBgn0037025 | CG11451    | -1.59 | -1.30 | 0.00 | 0.00 |
| <b>FBtr0084573</b> | FBgn0039164 | CG5524     | -1.23 | -0.96 | 0.00 | 0.00 |
| <b>FBtr0081099</b> | FBgn0032705 | Grip71     | -1.27 | -0.84 | 0.00 | 0.02 |
| <b>FBtr0089184</b> | FBgn0019985 | Glu-RA     | 1.76  | 1.48  | 0.00 | 0.01 |
| <b>FBtr0075350</b> | FBgn0063485 | Lasp       | -1.04 | -1.49 | 0.00 | 0.00 |
| <b>FBtr0075096</b> | FBgn0040322 | GNBP2      | 0.56  | 0.47  | 0.00 | 0.01 |
| <b>FBtr0071550</b> | FBgn0034569 | CG3221     | -1.52 | -2.00 | 0.00 | 0.00 |
| <b>FBtr0085110</b> | FBgn0029155 | Mdh        | -1.11 | -0.62 | 0.00 | 0.04 |
| <b>FBtr0081426</b> | FBgn0032895 | CG9335     | 2.68  | 2.03  | 0.00 | 0.00 |
| <b>FBtr0080853</b> | FBgn0032582 | CG13258    | -3.95 | -1.89 | 0.00 | 0.00 |
| <b>FBtr0073148</b> | FBgn0035462 | CG1120     | -0.66 | -0.54 | 0.00 | 0.02 |
| <b>FBtr0087306</b> | FBgn0050085 | CG30085    | -1.49 | 1.42  | 0.00 | 0.00 |
| <b>FBtr0082928</b> | FBgn0011474 | pr-set7    | -1.01 | -0.72 | 0.00 | 0.02 |
| <b>FBtr0082132</b> | FBgn0037746 | CG8478     | -3.40 | -0.86 | 0.00 | 0.04 |
| <b>FBtr0075094</b> | FBgn0040322 | GNBP2      | 0.72  | 0.52  | 0.00 | 0.01 |

|                    |             |              |       |       |      |      |
|--------------------|-------------|--------------|-------|-------|------|------|
| <b>FBtr0087743</b> | FBgn0033815 | CG4676       | 1.01  | 1.03  | 0.00 | 0.00 |
| <b>FBtr0084849</b> | FBgn0039328 | CG10675      | -1.45 | -1.51 | 0.00 | 0.00 |
| <b>FBtr0075097</b> | FBgn0040322 | GNBP2        | 0.59  | 0.51  | 0.01 | 0.03 |
| <b>FBtr0089940</b> | FBgn0025682 | scf          | 0.50  | 0.44  | 0.00 | 0.01 |
| <b>FBtr0088677</b> | FBgn0033348 | CG8247       | -0.89 | -0.53 | 0.00 | 0.02 |
| <b>FBtr0087143</b> | FBgn0034112 | CG3896       | -1.39 | -1.92 | 0.00 | 0.00 |
| <b>FBtr0078387</b> | FBgn0026371 | SAK          | -0.76 | -0.47 | 0.00 | 0.01 |
| <b>FBtr0087818</b> | FBgn0050488 | CG30488      | -1.31 | -1.04 | 0.00 | 0.01 |
| <b>FBtr0087725</b> | FBgn0033795 | Cap-G        | -0.84 | -0.51 | 0.00 | 0.02 |
| <b>FBtr0074475</b> | FBgn0030864 | CG8173       | -1.30 | -0.77 | 0.00 | 0.00 |
| <b>FBtr0073049</b> | FBgn0035427 | CG14959      | -0.44 | 0.47  | 0.04 | 0.03 |
| <b>FBtr0081049</b> | FBgn0032670 | CG5783       | 1.39  | 1.07  | 0.00 | 0.02 |
| <b>FBtr0083222</b> | FBgn0038394 | CG10264      | -1.04 | -1.37 | 0.01 | 0.00 |
| <b>FBtr0088745</b> | FBgn0014469 | Cyp4e2       | 0.60  | 0.89  | 0.04 | 0.00 |
| <b>FBtr0077262</b> | FBgn0052512 | CG32512      | 1.55  | 1.07  | 0.00 | 0.01 |
| <b>FBtr0073337</b> | FBgn0035538 | DopEcR       | 1.32  | -1.45 | 0.00 | 0.00 |
| <b>FBtr0078240</b> | FBgn0036978 | Toll-9       | -2.41 | -1.99 | 0.00 | 0.00 |
| <b>FBtr0088213</b> | FBgn0033541 | CG12934      | 5.63  | 5.94  | 0.00 | 0.00 |
| <b>FBtr0084850</b> | FBgn0045761 | CG10618      | -0.56 | -0.76 | 0.05 | 0.01 |
| <b>FBtr0091838</b> | FBgn0053834 | His1:CG33834 | -1.92 | -1.18 | 0.00 | 0.00 |
| <b>FBtr0085892</b> | FBgn0051617 | His1:CG31617 | -1.82 | -0.75 | 0.00 | 0.00 |
| <b>FBtr0073329</b> | FBgn0035553 | CG13722      | -3.30 | -0.85 | 0.00 | 0.03 |
| <b>FBtr0084707</b> | FBgn0039238 | CG7016       | 0.80  | -1.07 | 0.04 | 0.01 |
| <b>FBtr0072272</b> | FBgn0005638 | slbo         | -3.04 | -1.44 | 0.00 | 0.00 |
| <b>FBtr0073298</b> | FBgn0035543 | CG15020      | 2.45  | -1.89 | 0.00 | 0.01 |
| <b>FBtr0071928</b> | FBgn0034756 | Cyp6d2       | -2.75 | -1.68 | 0.00 | 0.00 |
| <b>FBtr0083995</b> | FBgn0038827 | Fancd2       | -1.61 | 0.88  | 0.00 | 0.01 |
| <b>FBtr0084481</b> | FBgn0039094 | CG10184      | -0.55 | -1.21 | 0.05 | 0.00 |
| <b>FBtr0084961</b> | FBgn0000591 | E(spl)       | -3.02 | -2.16 | 0.00 | 0.00 |
| <b>FBtr0087952</b> | FBgn0033737 | CG8831       | -0.57 | 0.46  | 0.00 | 0.01 |
| <b>FBtr0075675</b> | FBgn0003388 | shd          | 0.94  | -0.79 | 0.01 | 0.05 |
| <b>FBtr0083119</b> | FBgn0038321 | CG6218       | 0.40  | 1.15  | 0.01 | 0.00 |
| <b>FBtr0087122</b> | FBgn0034140 | CG8317       | -0.82 | -2.12 | 0.01 | 0.00 |
| <b>FBtr0084045</b> | FBgn0051189 | CG31189      | -2.45 | -3.06 | 0.00 | 0.00 |
| <b>FBtr0088982</b> | FBgn0015929 | dpa          | -1.05 | 0.76  | 0.00 | 0.03 |
| <b>FBtr0073136</b> | FBgn0035452 | CG10359      | -1.81 | -2.08 | 0.00 | 0.00 |
| <b>FBtr0087637</b> | FBgn0033874 | CG6347       | 1.22  | -1.26 | 0.03 | 0.03 |
| <b>FBtr0080638</b> | FBgn0020258 | ppk          | -2.94 | -1.31 | 0.00 | 0.02 |
| <b>FBtr0088003</b> | FBgn0033702 | CG8854       | 0.95  | -1.25 | 0.02 | 0.00 |
| <b>FBtr0075478</b> | FBgn0036591 | CG13050      | 2.43  | 1.09  | 0.00 | 0.04 |
| <b>FBtr0072585</b> | FBgn0035167 | Gr61a        | -1.30 | -1.90 | 0.00 | 0.00 |
| <b>FBtr0075906</b> | FBgn0036324 | CG12520      | -2.26 | -2.77 | 0.00 | 0.00 |
| <b>FBtr0079070</b> | FBgn0016076 | vri          | -2.37 | 2.40  | 0.00 | 0.00 |
| <b>FBtr0084150</b> | FBgn0038919 | CG17843      | -0.58 | -1.42 | 0.00 | 0.00 |

|                    |             |           |       |       |      |      |
|--------------------|-------------|-----------|-------|-------|------|------|
| <b>FBtr0072660</b> | FBgn0035199 | CG9134    | -0.70 | 0.78  | 0.01 | 0.00 |
| <b>FBtr0081569</b> | FBgn0011020 | l(3)s2214 | -0.62 | -0.90 | 0.04 | 0.00 |
| <b>FBtr0085580</b> | FBgn0039749 | CG11498   | 0.71  | 1.36  | 0.04 | 0.00 |
| <b>FBtr0088206</b> | FBgn0033579 | CG13229   | -1.09 | -0.97 | 0.00 | 0.01 |
| <b>FBtr0075403</b> | FBgn0052158 | CG32158   | -1.91 | -1.34 | 0.00 | 0.00 |
| <b>FBtr0082194</b> | FBgn0001321 | knk       | -1.54 | -1.21 | 0.00 | 0.00 |
| <b>FBtr0077137</b> | FBgn0035612 | CG10625   | -4.01 | -3.69 | 0.00 | 0.00 |
| <b>FBtr0077417</b> | FBgn0031629 | CG3244    | -4.15 | -1.22 | 0.00 | 0.03 |
| <b>FBtr0077080</b> | FBgn0052412 | CG32412   | -1.15 | -0.61 | 0.00 | 0.01 |
| <b>FBtr0073516</b> | FBgn0002948 | nod       | -0.71 | -0.94 | 0.02 | 0.00 |
| <b>FBtr0089969</b> | FBgn0034405 | Jheh2     | -1.29 | -1.66 | 0.00 | 0.00 |
| <b>FBtr0078634</b> | FBgn0037381 | CG10999   | -0.89 | -0.84 | 0.01 | 0.01 |
| <b>FBtr0071995</b> | FBgn0034800 | CG3788    | -1.02 | -0.49 | 0.00 | 0.05 |
| <b>FBtr0072129</b> | FBgn0011236 | ken       | -1.45 | -1.71 | 0.00 | 0.00 |
| <b>FBtr0088492</b> | FBgn0050001 | CG30001   | -0.81 | -0.79 | 0.01 | 0.01 |
| <b>FBtr0071788</b> | FBgn0034699 | CG13504   | 1.33  | 1.59  | 0.00 | 0.00 |
| <b>FBtr0100155</b> | FBgn0013974 | Gyc76C    | -0.75 | -0.51 | 0.00 | 0.04 |
| <b>FBtr0072462</b> | FBgn0052475 | mthl8     | -0.71 | -0.85 | 0.00 | 0.00 |
| <b>FBtr0074807</b> | FBgn0031071 | CG12701   | -1.54 | -1.15 | 0.00 | 0.00 |
| <b>FBtr0070681</b> | FBgn0025739 | pon       | -1.28 | -1.00 | 0.00 | 0.01 |
| <b>FBtr0087943</b> | FBgn0033749 | achi      | -0.63 | -0.41 | 0.00 | 0.04 |
| <b>FBtr0088474</b> | FBgn0033443 | CG1698    | -4.57 | -3.92 | 0.00 | 0.00 |
| <b>FBtr0079164</b> | FBgn0031737 | CG11142   | -2.32 | -1.29 | 0.00 | 0.01 |
| <b>FBtr0088634</b> | FBgn0033372 | CG13742   | -0.91 | -1.34 | 0.00 | 0.00 |
| <b>FBtr0076785</b> | FBgn0023076 | Clk       | -1.26 | -1.28 | 0.01 | 0.01 |
| <b>FBtr0088831</b> | FBgn0002891 | mus205    | -1.19 | -1.52 | 0.00 | 0.00 |
| <b>FBtr0077559</b> | FBgn0031549 | CG15415   | -1.26 | -1.24 | 0.00 | 0.00 |
| <b>FBtr0079561</b> | FBgn0031959 | Spz3      | -0.94 | -0.97 | 0.00 | 0.00 |
| <b>FBtr0070821</b> | FBgn0029820 | CG16721   | -0.56 | -0.56 | 0.02 | 0.02 |
| <b>FBtr0089970</b> | FBgn0034405 | Jheh2     | -1.33 | -1.58 | 0.00 | 0.00 |
| <b>FBtr0083692</b> | FBgn0038632 | CG14301   | -0.88 | -0.96 | 0.00 | 0.00 |
| <b>FBtr0082899</b> | FBgn0053329 | CG33329   | -2.53 | -3.07 | 0.00 | 0.00 |
| <b>FBtr0070245</b> | FBgn0026876 | CG11403   | -0.80 | -1.63 | 0.05 | 0.00 |
| <b>FBtr0088631</b> | FBgn0033375 | CG8078    | 0.45  | 0.62  | 0.02 | 0.00 |
| <b>FBtr0088844</b> | FBgn0050377 | CG30377   | -0.81 | -1.29 | 0.02 | 0.00 |
| <b>FBtr0086900</b> | FBgn0034249 | RhoGAP54D | -0.82 | -0.76 | 0.01 | 0.01 |
| <b>FBtr0075076</b> | FBgn0036824 | CG3902    | 0.78  | 0.53  | 0.00 | 0.00 |
| <b>FBtr0083378</b> | FBgn0015011 | Ahcy89E   | -2.04 | -1.78 | 0.00 | 0.00 |
| <b>FBtr0075402</b> | FBgn0052158 | CG32158   | -1.56 | -1.31 | 0.00 | 0.00 |
| <b>FBtr0075406</b> | FBgn0052158 | CG32158   | -1.45 | -1.43 | 0.00 | 0.00 |
| <b>FBtr0074824</b> | FBgn0036954 | CG17147   | 1.53  | 2.76  | 0.00 | 0.00 |
| <b>FBtr0087287</b> | FBgn0034046 | tun       | -0.60 | -0.80 | 0.00 | 0.00 |
| <b>FBtr0086139</b> | FBgn0033096 | ZIP1      | 1.29  | 0.85  | 0.00 | 0.02 |
| <b>FBtr0070416</b> | FBgn0029608 | CG3091    | -1.67 | -1.16 | 0.00 | 0.00 |

|                    |             |              |       |       |      |      |
|--------------------|-------------|--------------|-------|-------|------|------|
| <b>FBtr0078162</b> | FBgn0002931 | net          | -0.52 | -1.40 | 0.03 | 0.00 |
| <b>FBtr0083674</b> | FBgn0004461 | gwl          | -1.15 | -1.13 | 0.00 | 0.00 |
| <b>FBtr0084044</b> | FBgn0051207 | CG31207      | -1.49 | -1.75 | 0.01 | 0.00 |
| <b>FBtr0087514</b> | FBgn0033942 | CG10112      | -4.71 | -1.31 | 0.00 | 0.01 |
| <b>FBtr0088057</b> | FBgn0050038 | CG30038      | -0.62 | -0.71 | 0.04 | 0.02 |
| <b>FBtr0074945</b> | FBgn0036891 | CG9372       | -3.08 | -3.32 | 0.00 | 0.00 |
| <b>FBtr0076894</b> | FBgn0035718 | CG14820      | -1.27 | -2.40 | 0.00 | 0.00 |
| <b>FBtr0080137</b> | FBgn0051870 | CG31870      | -2.60 | -2.36 | 0.00 | 0.00 |
| <b>FBtr0085249</b> | FBgn0027579 | CG5508       | -0.72 | -0.65 | 0.00 | 0.01 |
| <b>FBtr0089270</b> | FBgn0010473 | tutl         | 0.50  | -0.57 | 0.05 | 0.02 |
| <b>FBtr0083379</b> | FBgn0015011 | Ahcy89E      | -2.04 | -1.73 | 0.00 | 0.00 |
| <b>FBtr0071413</b> | FBgn0052694 | CG32694      | -3.32 | -2.44 | 0.00 | 0.00 |
| <b>FBtr0089292</b> | FBgn0010549 | l(2)03659    | -1.55 | -2.64 | 0.00 | 0.00 |
| <b>FBtr0088055</b> | FBgn0033664 | MCPH1        | -1.19 | -0.97 | 0.01 | 0.03 |
| <b>FBtr0080887</b> | FBgn0002652 | squ          | -1.55 | -0.96 | 0.00 | 0.00 |
| <b>FBtr0083858</b> | FBgn0038741 | CG17186      | 1.04  | 1.10  | 0.00 | 0.00 |
| <b>FBtr0082378</b> | FBgn0040251 | Ugt86Di      | -1.49 | -1.54 | 0.01 | 0.01 |
| <b>FBtr0089463</b> | FBgn0041607 | AsnS         | -2.89 | -1.90 | 0.00 | 0.00 |
| <b>FBtr0084033</b> | FBgn0038857 | CG17282      | 0.70  | 0.66  | 0.00 | 0.00 |
| <b>FBtr0074592</b> | FBgn0030931 | Rad51D       | -1.94 | -1.13 | 0.00 | 0.00 |
| <b>FBtr0080105</b> | FBgn0040496 | CG17104      | -1.17 | -2.08 | 0.00 | 0.00 |
| <b>FBtr0072619</b> | FBgn0035179 | CG12038      | 1.02  | 1.19  | 0.01 | 0.00 |
| <b>FBtr0084113</b> | FBgn0038894 | CG15497      | 0.94  | 0.90  | 0.02 | 0.02 |
| <b>FBtr0084634</b> | FBgn0039180 | CG5715       | -0.90 | -0.83 | 0.01 | 0.01 |
| <b>FBtr0083603</b> | FBgn0053520 | Rpb4         | -0.52 | -0.72 | 0.05 | 0.00 |
| <b>FBtr0075125</b> | FBgn0052195 | CG32195      | -0.76 | -1.27 | 0.03 | 0.00 |
| <b>FBtr0080138</b> | FBgn0051870 | CG31870      | -2.71 | -2.20 | 0.00 | 0.00 |
| <b>FBtr0083753</b> | FBgn0027595 | CG5629       | -0.66 | -1.14 | 0.00 | 0.00 |
| <b>FBtr0083659</b> | FBgn0038633 | CG14303      | -1.40 | -1.46 | 0.00 | 0.00 |
| <b>FBtr0089698</b> | FBgn0040673 | CG15234      | -1.85 | -1.81 | 0.00 | 0.00 |
| <b>FBtr0085140</b> | FBgn0003495 | spz          | -1.28 | -2.62 | 0.00 | 0.00 |
| <b>FBtr0091911</b> | FBgn0053907 | His4:CG33907 | -3.41 | -1.45 | 0.00 | 0.00 |
| <b>FBtr0071425</b> | FBgn0052692 | CG32692      | -2.89 | -2.23 | 0.00 | 0.00 |
| <b>FBtr0074956</b> | FBgn0036901 | LCBP1        | -0.90 | -2.24 | 0.00 | 0.00 |
| <b>FBtr0085926</b> | FBgn0051611 | His4:CG31611 | -3.30 | -1.33 | 0.00 | 0.00 |
| <b>FBtr0082138</b> | FBgn0037753 | CG12947      | -1.42 | 1.03  | 0.00 | 0.01 |
| <b>FBtr0077934</b> | FBgn0031343 | CG18131      | -1.42 | -1.69 | 0.00 | 0.00 |
| <b>FBtr0083902</b> | FBgn0053192 | MtnD         | 1.26  | 1.07  | 0.02 | 0.05 |
| <b>FBtr0071535</b> | FBgn0003748 | Treh         | 0.84  | 0.47  | 0.00 | 0.01 |
| <b>FBtr0079510</b> | FBgn0041182 | TepII        | -0.78 | -0.67 | 0.02 | 0.05 |
| <b>FBtr0074954</b> | FBgn0036901 | LCBP1        | -0.90 | -2.30 | 0.00 | 0.00 |
| <b>FBtr0088105</b> | FBgn0033584 | CG7737       | -0.79 | -1.26 | 0.04 | 0.00 |
| <b>FBtr0083882</b> | FBgn0038788 | Sirt2        | 1.27  | 0.92  | 0.00 | 0.00 |
| <b>FBtr0089478</b> | FBgn0036640 | nxf2         | -1.03 | -1.27 | 0.00 | 0.00 |

|                    |             |              |       |       |      |      |
|--------------------|-------------|--------------|-------|-------|------|------|
| <b>FBtr0076304</b> | FBgn0052055 | CG32055      | 1.04  | 1.75  | 0.03 | 0.00 |
| <b>FBtr0085412</b> | FBgn0039641 | CG14511      | -0.69 | -0.63 | 0.00 | 0.00 |
| <b>FBtr0083950</b> | FBgn0038804 | CG10877      | -1.34 | -1.39 | 0.00 | 0.00 |
| <b>FBtr0085870</b> | FBgn0039886 | CG2003       | -0.54 | -0.53 | 0.00 | 0.00 |
| <b>FBtr0076523</b> | FBgn0035957 | CG5144       | -0.89 | 0.73  | 0.01 | 0.04 |
| <b>FBtr0089245</b> | FBgn0025726 | unc-13       | -1.02 | -0.76 | 0.00 | 0.01 |
| <b>FBtr0085142</b> | FBgn0003495 | spz          | -1.25 | -2.70 | 0.00 | 0.00 |
| <b>FBtr0076084</b> | FBgn0036208 | CG10361      | 1.43  | 3.43  | 0.03 | 0.00 |
| <b>FBtr0091873</b> | FBgn0053869 | His4:CG33869 | -2.73 | -1.35 | 0.00 | 0.00 |
| <b>FBtr0074211</b> | FBgn0000536 | eas          | -0.56 | -0.51 | 0.01 | 0.03 |
| <b>FBtr0070387</b> | FBgn0011576 | Cyp4d2       | -0.78 | -1.01 | 0.01 | 0.00 |
| <b>FBtr0085141</b> | FBgn0003495 | spz          | -1.26 | -2.71 | 0.00 | 0.00 |
| <b>FBtr0085139</b> | FBgn0003495 | spz          | -1.18 | -2.47 | 0.00 | 0.00 |
| <b>FBtr0073308</b> | FBgn0035557 | CG11353      | -2.89 | -1.57 | 0.00 | 0.01 |
| <b>FBtr0073255</b> | FBgn0035508 | CG15005      | -1.12 | -2.03 | 0.03 | 0.00 |
| <b>FBtr0083560</b> | FBgn0038581 | CG14314      | -1.16 | -0.96 | 0.00 | 0.00 |
| <b>FBtr0084572</b> | FBgn0039167 | CG17786      | -1.31 | 1.52  | 0.00 | 0.00 |
| <b>FBtr0077203</b> | FBgn0003423 | slgA         | 0.75  | -0.75 | 0.04 | 0.04 |
| <b>FBtr0088073</b> | FBgn0050035 | CG30035      | 2.37  | 1.21  | 0.00 | 0.03 |
| <b>FBtr0087646</b> | FBgn0033873 | CG6337       | 0.95  | -1.14 | 0.01 | 0.00 |
| <b>FBtr0081069</b> | FBgn0032685 | CG10211      | -1.98 | -1.96 | 0.00 | 0.00 |
| <b>FBtr0070197</b> | FBgn0040364 | CG11378      | -0.98 | -2.48 | 0.03 | 0.00 |
| <b>FBtr0081334</b> | FBgn0032848 | CG10722      | -1.59 | -1.94 | 0.00 | 0.00 |
| <b>FBtr0081154</b> | FBgn0000075 | amd          | -1.49 | -1.15 | 0.00 | 0.02 |
| <b>FBtr0074955</b> | FBgn0036901 | LCBP1        | -1.11 | -2.52 | 0.00 | 0.00 |
| <b>FBtr0084031</b> | FBgn0038859 | Obp93a       | 1.39  | 0.99  | 0.00 | 0.04 |
| <b>FBtr0074990</b> | FBgn0036855 | CG14084      | 1.01  | 1.14  | 0.01 | 0.00 |
| <b>FBtr0072251</b> | FBgn0041706 | CG3253       | -1.30 | -1.65 | 0.00 | 0.00 |
| <b>FBtr0087233</b> | FBgn0050094 | CG30094      | 0.95  | 0.94  | 0.04 | 0.04 |
| <b>FBtr0088974</b> | FBgn0033174 | CG11125      | -2.52 | -1.72 | 0.00 | 0.00 |
| <b>FBtr0081153</b> | FBgn0000075 | amd          | -1.59 | -0.98 | 0.00 | 0.03 |
| <b>FBtr0079468</b> | FBgn0031906 | CG5160       | -1.60 | -1.00 | 0.00 | 0.03 |
| <b>FBtr0081209</b> | FBgn0032783 | CG10237      | -1.17 | 0.69  | 0.00 | 0.01 |
| <b>FBtr0080294</b> | FBgn0032402 | CG14945      | -1.00 | -0.96 | 0.00 | 0.00 |
| <b>FBtr0085137</b> | FBgn0003495 | spz          | -1.23 | -2.42 | 0.00 | 0.00 |
| <b>FBtr0089784</b> | FBgn0003177 | pyd          | -0.64 | -0.79 | 0.01 | 0.00 |
| <b>FBtr0070857</b> | FBgn0029779 | CG11473      | 1.12  | 1.53  | 0.01 | 0.00 |
| <b>FBtr0100369</b> | FBgn0028428 | lh           | -2.11 | -2.16 | 0.00 | 0.00 |
| <b>FBtr0076697</b> | FBgn0035856 | CG13679      | -1.46 | -1.71 | 0.00 | 0.00 |
| <b>FBtr0071867</b> | FBgn0050269 | CG30269      | -1.16 | -0.59 | 0.00 | 0.03 |
| <b>FBtr0076276</b> | FBgn0047038 | CG6463       | 1.02  | 1.42  | 0.04 | 0.00 |
| <b>FBtr0074989</b> | FBgn0036855 | CG14084      | 0.92  | 1.19  | 0.03 | 0.00 |
| <b>FBtr0085144</b> | FBgn0003495 | spz          | -1.11 | -2.35 | 0.00 | 0.00 |
| <b>FBtr0073169</b> | FBgn0035480 | CG14984      | -1.49 | -0.83 | 0.00 | 0.02 |

|                    |             |          |       |       |      |      |
|--------------------|-------------|----------|-------|-------|------|------|
| <b>FBtr0083584</b> | FBgn0004618 | gl       | -0.93 | -0.85 | 0.01 | 0.02 |
| <b>FBtr0088175</b> | FBgn0040763 | CG18336  | 0.72  | 0.72  | 0.01 | 0.00 |
| <b>FBtr0085737</b> | FBgn0039821 | CG15556  | -1.56 | -3.10 | 0.02 | 0.00 |
| <b>FBtr0085371</b> | FBgn0039637 | CG11880  | -0.77 | -0.74 | 0.02 | 0.03 |
| <b>FBtr0072916</b> | FBgn0035309 | CG15879  | -0.87 | -1.31 | 0.00 | 0.00 |
| <b>FBtr0077117</b> | FBgn0035636 | Cralbp   | -1.18 | -1.05 | 0.01 | 0.02 |
| <b>FBtr0071824</b> | FBgn0034725 | CG6044   | -1.47 | -0.95 | 0.00 | 0.03 |
| <b>FBtr0085145</b> | FBgn0003495 | spz      | -1.22 | -2.56 | 0.00 | 0.00 |
| <b>FBtr0085583</b> | FBgn0003738 | Tpi      | 1.39  | 1.05  | 0.00 | 0.00 |
| <b>FBtr0082825</b> | FBgn0038179 | CG9312   | -2.30 | -1.27 | 0.00 | 0.00 |
| <b>FBtr0071416</b> | FBgn0030171 | CG2989   | -2.72 | -1.28 | 0.00 | 0.00 |
| <b>FBtr0089549</b> | FBgn0026309 | aft      | -0.51 | -0.48 | 0.02 | 0.03 |
| <b>FBtr0086954</b> | FBgn0034223 | CG6522   | -0.52 | -0.52 | 0.03 | 0.04 |
| <b>FBtr0077619</b> | FBgn0031468 | CG2975   | -2.05 | -1.27 | 0.00 | 0.03 |
| <b>FBtr0085449</b> | FBgn0039677 | CG18110  | -1.11 | -1.55 | 0.00 | 0.00 |
| <b>FBtr0071786</b> | FBgn0034705 | CG11170  | -0.41 | -0.84 | 0.03 | 0.00 |
| <b>FBtr0075473</b> | FBgn0036595 | CG13046  | 2.21  | 1.73  | 0.00 | 0.00 |
| <b>FBtr0080238</b> | FBgn0032362 | CG14928  | -1.21 | 1.25  | 0.00 | 0.00 |
| <b>FBtr0100451</b> | FBgn0053155 | CG33155  | 0.47  | 0.41  | 0.02 | 0.04 |
| <b>FBtr0082568</b> | FBgn0038017 | CG4115   | -1.53 | 1.43  | 0.02 | 0.03 |
| <b>FBtr0079163</b> | FBgn0031737 | CG11142  | -1.21 | -2.05 | 0.01 | 0.00 |
| <b>FBtr0081917</b> | FBgn0037630 | CG11775  | -4.40 | -3.71 | 0.00 | 0.00 |
| <b>FBtr0085116</b> | FBgn0003482 | spn-D    | -2.67 | -2.77 | 0.00 | 0.00 |
| <b>FBtr0080188</b> | FBgn0011676 | Nos      | -2.78 | -2.14 | 0.00 | 0.02 |
| <b>FBtr0085143</b> | FBgn0003495 | spz      | -1.38 | -2.74 | 0.00 | 0.00 |
| <b>FBtr0071427</b> | FBgn0030166 | CG15251  | -4.09 | -2.50 | 0.00 | 0.00 |
| <b>FBtr0084438</b> | FBgn0039101 | CG16710  | 1.02  | 0.86  | 0.00 | 0.01 |
| <b>FBtr0075754</b> | FBgn0036382 | CG13737  | -1.92 | 1.99  | 0.00 | 0.00 |
| <b>FBtr0082437</b> | FBgn0037936 | CG6908   | -3.38 | -1.59 | 0.00 | 0.00 |
| <b>FBtr0073031</b> | FBgn0052280 | CG32280  | 0.51  | 0.57  | 0.01 | 0.00 |
| <b>FBtr0082324</b> | FBgn0022359 | Sodh-2   | 1.10  | 1.47  | 0.00 | 0.00 |
| <b>FBtr0081422</b> | FBgn0051673 | CG31673  | -0.87 | -0.77 | 0.01 | 0.02 |
| <b>FBtr0075659</b> | FBgn0036474 | Or71a    | -1.20 | -0.79 | 0.00 | 0.03 |
| <b>FBtr0071823</b> | FBgn0034725 | CG6044   | -1.54 | -1.06 | 0.00 | 0.02 |
| <b>FBtr0072570</b> | FBgn0023000 | mth      | 0.57  | 0.68  | 0.00 | 0.00 |
| <b>FBtr0085677</b> | FBgn0039790 | CG2246   | 1.95  | 1.73  | 0.00 | 0.00 |
| <b>FBtr0089378</b> | FBgn0040796 | CG13064  | 2.01  | 1.24  | 0.00 | 0.04 |
| <b>FBtr0100046</b> | FBgn0053993 | CG33993  | -0.54 | -0.72 | 0.01 | 0.00 |
| <b>FBtr0082877</b> | FBgn0038190 | CG9926   | -1.21 | -0.78 | 0.00 | 0.01 |
| <b>FBtr0079477</b> | FBgn0041181 | TepIII   | -1.46 | 1.45  | 0.00 | 0.00 |
| <b>FBtr0072426</b> | FBgn0028738 | ETH      | -1.16 | -0.77 | 0.00 | 0.01 |
| <b>FBtr0072427</b> | FBgn0015801 | Reg-5    | -0.61 | 0.96  | 0.04 | 0.00 |
| <b>FBtr0084125</b> | FBgn0038897 | CG5849   | -1.47 | -1.18 | 0.00 | 0.00 |
| <b>FBtr0077115</b> | FBgn0035638 | Tektin-C | -5.39 | -6.34 | 0.00 | 0.00 |

|                    |             |          |       |       |      |      |
|--------------------|-------------|----------|-------|-------|------|------|
| <b>FBtr0081618</b> | FBgn0000071 | Ama      | -1.73 | -0.84 | 0.00 | 0.00 |
| <b>FBtr0073324</b> | FBgn0052244 | CG32244  | -1.40 | 1.78  | 0.00 | 0.00 |
| <b>FBtr0077604</b> | FBgn0031516 | CG9663   | -0.48 | -0.84 | 0.02 | 0.00 |
| <b>FBtr0086927</b> | FBgn0050104 | CG30104  | -3.58 | -5.55 | 0.00 | 0.00 |
| <b>FBtr0076317</b> | FBgn0036043 | CG8177   | -0.77 | -1.49 | 0.00 | 0.00 |
| <b>FBtr0075673</b> | FBgn0040487 | BobA     | -2.27 | -0.98 | 0.00 | 0.02 |
| <b>FBtr0086677</b> | FBgn0063491 | GstE9    | -1.19 | 1.35  | 0.02 | 0.01 |
| <b>FBtr0081753</b> | FBgn0051284 | CG31284  | -1.02 | 1.08  | 0.01 | 0.01 |
| <b>FBtr0087513</b> | FBgn0050076 | CG30076  | -2.46 | -1.70 | 0.00 | 0.00 |
| <b>FBtr0072501</b> | FBgn0052476 | mthl14   | -1.50 | -1.35 | 0.02 | 0.04 |
| <b>FBtr0080740</b> | FBgn0001983 | wor      | -0.62 | -0.62 | 0.03 | 0.03 |
| <b>FBtr0081534</b> | FBgn0037503 | CG14598  | -4.24 | -1.77 | 0.00 | 0.03 |
| <b>FBtr0083639</b> | FBgn0038629 | CG14304  | -1.50 | -0.90 | 0.00 | 0.03 |
| <b>FBtr0084693</b> | FBgn0040600 | CG13631  | -1.20 | 1.21  | 0.01 | 0.01 |
| <b>FBtr0077330</b> | FBgn0031106 | Syx16    | 0.72  | 0.73  | 0.04 | 0.04 |
| <b>FBtr0083989</b> | FBgn0038835 | CG17274  | -0.92 | -0.74 | 0.00 | 0.02 |
| <b>FBtr0074153</b> | FBgn0030716 | CG9170   | -1.48 | -1.49 | 0.00 | 0.00 |
| <b>FBtr0081474</b> | FBgn0051627 | CG31627  | -2.96 | -2.59 | 0.00 | 0.00 |
| <b>FBtr0089128</b> | FBgn0039905 | CG2052   | -2.06 | -2.45 | 0.00 | 0.00 |
| <b>FBtr0072767</b> | FBgn0035266 | CG7995   | 1.38  | 0.67  | 0.00 | 0.04 |
| <b>FBtr0081207</b> | FBgn0032783 | CG10237  | -0.93 | 0.57  | 0.00 | 0.01 |
| <b>FBtr0083039</b> | FBgn0038289 | CG6934   | 1.47  | 2.22  | 0.01 | 0.00 |
| <b>FBtr0087530</b> | FBgn0050069 | CG30069  | -1.13 | 0.72  | 0.00 | 0.03 |
| <b>FBtr0073341</b> | FBgn0066365 | dyl      | -2.08 | 1.74  | 0.00 | 0.02 |
| <b>FBtr0073273</b> | FBgn0035497 | CG14995  | -1.33 | 1.91  | 0.02 | 0.00 |
| <b>FBtr0078346</b> | FBgn0027542 | CG6014   | -0.86 | 0.56  | 0.00 | 0.05 |
| <b>FBtr0084643</b> | FBgn0039203 | CG13618  | -4.76 | -1.93 | 0.00 | 0.00 |
| <b>FBtr0087824</b> | FBgn0033753 | Cyp301a1 | -0.85 | 0.89  | 0.01 | 0.00 |
| <b>FBtr0088311</b> | FBgn0033524 | Cyp49a1  | -0.83 | 1.99  | 0.04 | 0.00 |
| <b>FBtr0084722</b> | FBgn0040601 | CG13643  | -3.01 | -1.54 | 0.00 | 0.00 |
| <b>FBtr0078615</b> | FBgn0037412 | Osi4     | -1.61 | 2.48  | 0.01 | 0.00 |
| <b>FBtr0073271</b> | FBgn0035497 | CG14995  | -1.13 | 2.10  | 0.04 | 0.00 |
| <b>FBtr0077646</b> | FBgn0031488 | CG17265  | 0.53  | 0.78  | 0.01 | 0.00 |
| <b>FBtr0085638</b> | FBgn0039759 | CG9733   | -2.21 | 1.75  | 0.00 | 0.00 |
| <b>FBtr0080133</b> | FBgn0021953 | Fatp     | -0.47 | 0.51  | 0.05 | 0.03 |
| <b>FBtr0080554</b> | FBgn0032535 | Ance-2   | -2.24 | 1.85  | 0.00 | 0.00 |
| <b>FBtr0076716</b> | FBgn0035865 | CG7201   | -1.56 | 2.10  | 0.01 | 0.00 |
| <b>FBtr0070072</b> | FBgn0000022 | ac       | -0.68 | -2.50 | 0.01 | 0.00 |
| <b>FBtr0080408</b> | FBgn0032449 | CG17036  | -0.73 | -1.93 | 0.01 | 0.00 |
| <b>FBtr0078867</b> | FBgn0052946 | CG32946  | 3.77  | 2.04  | 0.00 | 0.00 |
| <b>FBtr0080621</b> | FBgn0052971 | CG32971  | -1.45 | -2.05 | 0.00 | 0.00 |
| <b>FBtr0075823</b> | FBgn0036369 | CG10089  | -1.59 | -1.27 | 0.00 | 0.00 |
| <b>FBtr0085584</b> | FBgn0003738 | Tpi      | 1.05  | 1.67  | 0.00 | 0.00 |
| <b>FBtr0100832</b> | FBgn0065108 | ppk16    | 0.68  | 1.10  | 0.03 | 0.00 |



|                    |             |         |       |       |      |      |
|--------------------|-------------|---------|-------|-------|------|------|
| <b>FBtr0089667</b> | FBgn0036681 | CG13027 | -0.74 | -0.95 | 0.02 | 0.00 |
| <b>FBtr0075361</b> | FBgn0036648 | CG4098  | 0.48  | 0.61  | 0.00 | 0.00 |
| <b>FBtr0077920</b> | FBgn0031327 | CG5397  | -1.93 | -1.84 | 0.00 | 0.00 |
| <b>FBtr0080406</b> | FBgn0032452 | CG15484 | -2.25 | -2.17 | 0.00 | 0.00 |
| <b>FBtr0081166</b> | FBgn0000422 | Ddc     | -2.21 | -1.89 | 0.00 | 0.00 |
| <b>FBtr0075870</b> | FBgn0036323 | CG14118 | -2.26 | -1.93 | 0.00 | 0.00 |
| <b>FBtr0070073</b> | FBgn0004170 | sc      | -0.65 | -1.79 | 0.05 | 0.00 |
| <b>FBtr0071608</b> | FBgn0034627 | EfSec   | -0.71 | -0.65 | 0.00 | 0.00 |
| <b>FBtr0076915</b> | FBgn0010387 | Dbi     | 0.93  | 1.92  | 0.02 | 0.00 |
| <b>FBtr0076439</b> | FBgn0035977 | PGRP-LF | -1.56 | -1.09 | 0.00 | 0.00 |
| <b>FBtr0072807</b> | FBgn0035253 | CG7971  | -0.43 | -0.55 | 0.02 | 0.00 |
| <b>FBtr0089491</b> | FBgn0035976 | PGRP-LC | -1.95 | -1.50 | 0.00 | 0.00 |
| <b>FBtr0076916</b> | FBgn0010387 | Dbi     | 0.96  | 2.06  | 0.04 | 0.00 |
| <b>FBtr0078593</b> | FBgn0037410 | Osi2    | -1.99 | -0.56 | 0.00 | 0.04 |
| <b>FBtr0083463</b> | FBgn0038525 | CG14329 | -0.58 | 0.65  | 0.03 | 0.01 |
| <b>FBtr0084344</b> | FBgn0039041 | CG13838 | 0.87  | 0.88  | 0.02 | 0.02 |
| <b>FBtr0074983</b> | FBgn0052207 | CG32207 | -0.65 | -0.82 | 0.00 | 0.00 |
| <b>FBtr0071429</b> | FBgn0030163 | CG1791  | -2.13 | -1.22 | 0.00 | 0.01 |
| <b>FBtr0072571</b> | FBgn0023000 | mth     | 0.59  | 0.78  | 0.01 | 0.00 |
| <b>FBtr0070101</b> | FBgn0052816 | CG32816 | -0.97 | -0.97 | 0.02 | 0.02 |
| <b>FBtr0085423</b> | FBgn0004369 | Ptp99A  | -0.61 | -0.90 | 0.04 | 0.00 |
| <b>FBtr0079547</b> | FBgn0031976 | CG7367  | -0.89 | -1.46 | 0.00 | 0.00 |
| <b>FBtr0075006</b> | FBgn0003089 | pip     | -0.93 | -1.32 | 0.02 | 0.00 |
| <b>FBtr0083923</b> | FBgn0051203 | CG31203 | -1.06 | 0.86  | 0.00 | 0.01 |
| <b>FBtr0086632</b> | FBgn0034394 | CG15096 | -1.77 | -1.05 | 0.00 | 0.04 |
| <b>FBtr0100226</b> | FBgn0029608 | CG3091  | -1.75 | -0.92 | 0.00 | 0.02 |
| <b>FBtr0083140</b> | FBgn0038299 | CG6687  | -0.89 | -1.21 | 0.03 | 0.00 |
| <b>FBtr0082598</b> | FBgn0038037 | Cyp9f2  | -1.20 | -1.06 | 0.00 | 0.00 |
| <b>FBtr0083711</b> | FBgn0038674 | CG14285 | 0.67  | 0.96  | 0.04 | 0.00 |
| <b>FBtr0083673</b> | FBgn0038647 | CG14302 | -1.35 | -1.87 | 0.01 | 0.00 |
| <b>FBtr0089235</b> | FBgn0005558 | ey      | 1.30  | 0.97  | 0.00 | 0.02 |
| <b>FBtr0089490</b> | FBgn0035976 | PGRP-LC | -1.36 | -1.44 | 0.00 | 0.00 |
| <b>FBtr0075915</b> | FBgn0052112 | CG32112 | -0.40 | -0.47 | 0.02 | 0.01 |
| <b>FBtr0085862</b> | FBgn0039872 | CG2196  | -3.38 | -2.18 | 0.00 | 0.00 |
| <b>FBtr0089367</b> | FBgn0000303 | Cha     | -2.15 | -2.58 | 0.00 | 0.00 |
| <b>FBtr0086886</b> | FBgn0028494 | CG6424  | 0.99  | 1.20  | 0.00 | 0.00 |
| <b>FBtr0078882</b> | FBgn0051530 | CG31530 | 2.44  | 1.52  | 0.00 | 0.01 |
| <b>FBtr0087935</b> | FBgn0033742 | CG8550  | -2.33 | -1.18 | 0.00 | 0.00 |
| <b>FBtr0088471</b> | FBgn0005614 | trpl    | -2.35 | -3.97 | 0.00 | 0.00 |
| <b>FBtr0072955</b> | FBgn0028504 | CG12182 | -0.99 | -1.13 | 0.00 | 0.00 |
| <b>FBtr0075398</b> | FBgn0026061 | Mipp1   | -0.65 | -0.65 | 0.01 | 0.01 |
| <b>FBtr0089492</b> | FBgn0035976 | PGRP-LC | -2.06 | -1.16 | 0.00 | 0.01 |
| <b>FBtr0081903</b> | FBgn0037611 | CG11755 | -0.50 | -0.65 | 0.00 | 0.00 |
| <b>FBtr0075027</b> | FBgn0036849 | CG14079 | -2.67 | -1.53 | 0.00 | 0.00 |

|                    |             |            |       |       |      |      |
|--------------------|-------------|------------|-------|-------|------|------|
| <b>FBtr0071409</b> | FBgn0030164 | CG1889     | -3.02 | -2.14 | 0.00 | 0.00 |
| <b>FBtr0079564</b> | FBgn0031955 | CG14535    | -1.23 | -0.94 | 0.01 | 0.04 |
| <b>FBtr0075424</b> | FBgn0036619 | CG4784     | -3.39 | -2.42 | 0.00 | 0.00 |
| <b>FBtr0082599</b> | FBgn0038037 | Cyp9f2     | -1.29 | -1.15 | 0.00 | 0.00 |
| <b>FBtr0100482</b> | FBgn0014869 | Pglym78    | 0.76  | 1.03  | 0.04 | 0.00 |
| <b>FBtr0086060</b> | FBgn0033033 | scarface   | -1.41 | -2.71 | 0.00 | 0.00 |
| <b>FBtr0071720</b> | FBgn0034666 | CG9294     | -1.45 | 1.61  | 0.03 | 0.01 |
| <b>FBtr0088211</b> | FBgn0033574 | CG7722     | -1.83 | -2.08 | 0.00 | 0.00 |
| <b>FBtr0072912</b> | FBgn0026593 | CG5707     | -3.35 | -5.09 | 0.00 | 0.00 |
| <b>FBtr0076467</b> | FBgn0036003 | CG14180    | 0.54  | 0.46  | 0.01 | 0.02 |
| <b>FBtr0071408</b> | FBgn0030164 | CG1889     | -2.75 | -2.10 | 0.00 | 0.00 |
| <b>FBtr0071428</b> | FBgn0030165 | CG15250    | -4.23 | -2.28 | 0.00 | 0.00 |
| <b>FBtr0072039</b> | FBgn0046253 | CG3502     | -2.36 | -1.40 | 0.00 | 0.00 |
| <b>FBtr0079579</b> | FBgn0051607 | CG31607    | -3.13 | -1.87 | 0.00 | 0.00 |
| <b>FBtr0082608</b> | FBgn0038020 | GstD9      | 1.78  | 2.09  | 0.00 | 0.00 |
| <b>FBtr0080433</b> | FBgn0032473 | CG5204     | -2.53 | -1.43 | 0.00 | 0.00 |
| <b>FBtr0074953</b> | FBgn0052209 | CG32209    | -2.21 | -3.65 | 0.00 | 0.00 |
| <b>FBtr0076704</b> | FBgn0035864 | CG33274    | -3.16 | -3.77 | 0.00 | 0.00 |
| <b>FBtr0084100</b> | FBgn0038878 | CG3301     | -1.85 | -1.02 | 0.00 | 0.00 |
| <b>FBtr0076718</b> | FBgn0035861 | CG7213     | -4.71 | -5.20 | 0.00 | 0.00 |
| <b>FBtr0076599</b> | FBgn0000121 | Arr2       | -2.41 | -2.23 | 0.00 | 0.00 |
| <b>FBtr0081935</b> | FBgn0037631 | CG11776    | -4.11 | -3.25 | 0.00 | 0.00 |
| <b>FBtr0084544</b> | FBgn0039152 | CG6129     | 2.01  | 1.96  | 0.00 | 0.00 |
| <b>FBtr0074969</b> | FBgn0020277 | lush       | -1.85 | -1.44 | 0.00 | 0.00 |
| <b>FBtr0073984</b> | FBgn0030589 | CG9519     | -4.54 | -2.95 | 0.00 | 0.00 |
| <b>FBtr0089267</b> | FBgn0030538 | CG13402    | -2.73 | -1.14 | 0.00 | 0.00 |
| <b>FBtr0076698</b> | FBgn0035857 | CG8006     | -1.76 | -1.95 | 0.00 | 0.00 |
| <b>FBtr0084321</b> | FBgn0051139 | CG31139    | -2.26 | -0.91 | 0.00 | 0.03 |
| <b>FBtr0076720</b> | FBgn0052364 | CG32364    | -2.61 | -3.33 | 0.00 | 0.00 |
| <b>FBtr0075899</b> | FBgn0036332 | CG11261    | -2.11 | -1.58 | 0.00 | 0.00 |
| <b>FBtr0085861</b> | FBgn0017448 | CG2187     | -1.53 | -0.63 | 0.00 | 0.05 |
| <b>FBtr0077976</b> | FBgn0031326 | CG5156     | -3.43 | -5.16 | 0.00 | 0.00 |
| <b>FBtr0071988</b> | FBgn0034808 | CG9896     | 1.15  | 1.24  | 0.00 | 0.00 |
| <b>FBtr0079436</b> | FBgn0002938 | ninaC      | -1.45 | -1.07 | 0.00 | 0.00 |
| <b>FBtr0070872</b> | FBgn0029843 | Nep1       | -1.90 | -2.31 | 0.00 | 0.00 |
| <b>FBtr0084337</b> | FBgn0017590 | klg        | -3.19 | -2.57 | 0.00 | 0.00 |
| <b>FBtr0082069</b> | FBgn0027950 | MBD-like   | 1.08  | 0.78  | 0.00 | 0.00 |
| <b>FBtr0087083</b> | FBgn0034151 | CG15617    | -1.96 | -1.26 | 0.00 | 0.01 |
| <b>FBtr0076703</b> | FBgn0035862 | CG13672    | -1.52 | -0.91 | 0.00 | 0.01 |
| <b>FBtr0086033</b> | FBgn0033048 | CG7881     | -1.52 | -1.66 | 0.00 | 0.00 |
| <b>FBtr0084859</b> | FBgn0039321 | CG10550    | -1.00 | -0.57 | 0.00 | 0.03 |
| <b>FBtr0076500</b> | FBgn0035978 | UGP        | -0.89 | -0.96 | 0.00 | 0.00 |
| <b>FBtr0081550</b> | FBgn0015575 | alpha-Est7 | -1.82 | -1.54 | 0.00 | 0.00 |
| <b>FBtr0085308</b> | FBgn0039594 | CG9990     | -0.91 | -1.40 | 0.00 | 0.00 |

|                    |             |          |       |       |      |      |
|--------------------|-------------|----------|-------|-------|------|------|
| <b>FBtr0079929</b> | FBgn0000180 | bib      | -1.13 | -0.94 | 0.00 | 0.00 |
| <b>FBtr0086934</b> | FBgn0034229 | CG4847   | -1.26 | -0.74 | 0.00 | 0.03 |
| <b>FBtr0072587</b> | FBgn0035169 | CG13890  | -0.86 | -0.67 | 0.00 | 0.00 |
| <b>FBtr0075426</b> | FBgn0011693 | Pdh      | -1.16 | -0.68 | 0.00 | 0.05 |
| <b>FBtr0087157</b> | FBgn0034126 | CG4398   | -1.77 | -1.43 | 0.00 | 0.00 |
| <b>FBtr0076623</b> | FBgn0035905 | CG6781   | -1.27 | -0.92 | 0.00 | 0.01 |
| <b>FBtr0073583</b> | FBgn0000808 | gd       | -1.65 | -1.00 | 0.00 | 0.04 |
| <b>FBtr0085629</b> | FBgn0039764 | CG15535  | 1.62  | 2.02  | 0.00 | 0.00 |
| <b>FBtr0084132</b> | FBgn0038902 | CG6800   | -1.16 | -1.45 | 0.00 | 0.00 |
| <b>FBtr0077010</b> | FBgn0035696 | Best2    | -1.07 | -1.05 | 0.00 | 0.00 |
| <b>FBtr0086564</b> | FBgn0053453 | CG33453  | -1.75 | -2.56 | 0.00 | 0.00 |
| <b>FBtr0089025</b> | FBgn0033129 | Tsp42Eh  | -0.94 | -0.85 | 0.00 | 0.00 |
| <b>FBtr0078101</b> | FBgn0031213 | galectin | -0.88 | -0.67 | 0.00 | 0.01 |
| <b>FBtr0072337</b> | FBgn0035040 | CG4741   | -1.56 | -1.24 | 0.00 | 0.01 |
| <b>FBtr0076434</b> | FBgn0035975 | PGRP-LA  | -0.95 | -1.03 | 0.00 | 0.00 |
| <b>FBtr0082600</b> | FBgn0038035 | CG17227  | -0.66 | -0.88 | 0.00 | 0.00 |
| <b>FBtr0086937</b> | FBgn0034229 | CG4847   | -1.34 | -0.94 | 0.00 | 0.03 |
| <b>FBtr0070836</b> | FBgn0029804 | CG3097   | -1.47 | -3.02 | 0.00 | 0.00 |
| <b>FBtr0079434</b> | FBgn0031902 | Wnt6     | -1.07 | -1.43 | 0.00 | 0.00 |
| <b>FBtr0084713</b> | FBgn0039246 | CG10845  | -1.70 | -1.76 | 0.00 | 0.00 |
| <b>FBtr0075013</b> | FBgn0003089 | pip      | -1.28 | -1.20 | 0.00 | 0.00 |
| <b>FBtr0079472</b> | FBgn0031926 | CG6739   | -2.04 | -2.18 | 0.00 | 0.00 |
| <b>FBtr0082323</b> | FBgn0037818 | CG6465   | -1.52 | -1.72 | 0.00 | 0.00 |
| <b>FBtr0082338</b> | FBgn0040259 | Ugt86Da  | -0.87 | -1.34 | 0.00 | 0.00 |
| <b>FBtr0091709</b> | FBgn0035635 | PGRP-LD  | -1.20 | -0.94 | 0.00 | 0.02 |
| <b>FBtr0083271</b> | FBgn0038416 | CG17930  | -1.15 | -0.88 | 0.00 | 0.03 |
| <b>FBtr0074603</b> | FBgn0004959 | phm      | -1.16 | -1.46 | 0.00 | 0.00 |
| <b>FBtr0084666</b> | FBgn0039214 | CG5794   | -0.94 | -0.73 | 0.00 | 0.03 |
| <b>FBtr0081421</b> | FBgn0032889 | CG9331   | -0.81 | -0.66 | 0.00 | 0.03 |
| <b>FBtr0100285</b> | FBgn0050481 | mRpL53   | 0.54  | 0.56  | 0.00 | 0.00 |
| <b>FBtr0085822</b> | FBgn0039863 | CG1815   | -0.64 | -0.80 | 0.00 | 0.00 |
| <b>FBtr0072239</b> | FBgn0034909 | CG4797   | -0.69 | -1.36 | 0.01 | 0.00 |
| <b>FBtr0075475</b> | FBgn0036593 | CG13048  | -1.13 | -1.45 | 0.01 | 0.00 |
| <b>FBtr0084857</b> | FBgn0039321 | CG10550  | -0.92 | -1.01 | 0.01 | 0.00 |
| <b>FBtr0080880</b> | FBgn0028523 | CG5888   | -0.78 | -1.01 | 0.01 | 0.00 |
| <b>FBtr0070990</b> | FBgn0029888 | CG3192   | 1.00  | 1.47  | 0.01 | 0.00 |
| <b>FBtr0084259</b> | FBgn0038979 | CG7046   | -2.60 | -2.82 | 0.01 | 0.00 |
| <b>FBtr0081038</b> | FBgn0032668 | CG17681  | -1.24 | -1.83 | 0.01 | 0.00 |
| <b>FBtr0072313</b> | FBgn0020521 | pio      | -1.07 | -1.00 | 0.01 | 0.02 |
| <b>FBtr0076432</b> | FBgn0035975 | PGRP-LA  | -0.83 | -0.72 | 0.01 | 0.03 |
| <b>FBtr0087313</b> | FBgn0050084 | tun      | -1.11 | -0.96 | 0.01 | 0.03 |
| <b>FBtr0075012</b> | FBgn0003089 | pip      | -0.71 | -1.05 | 0.01 | 0.00 |
| <b>FBtr0076696</b> | FBgn0035856 | CG13679  | -1.08 | -1.12 | 0.01 | 0.01 |
| <b>FBtr0075638</b> | FBgn0036480 | CG17081  | -0.68 | -0.72 | 0.01 | 0.01 |

|                    |             |          |       |       |      |      |
|--------------------|-------------|----------|-------|-------|------|------|
| <b>FBtr0089001</b> | FBgn0050502 | CG30502  | -0.76 | -0.76 | 0.01 | 0.01 |
| <b>FBtr0081516</b> | FBgn0023090 | dtr      | -1.05 | -0.99 | 0.01 | 0.02 |
| <b>FBtr0082486</b> | FBgn0037970 | CG12201  | 0.62  | 0.72  | 0.02 | 0.00 |
| <b>FBtr0075990</b> | FBgn0036246 | CG17154  | -0.93 | -0.97 | 0.02 | 0.01 |
| <b>FBtr0088938</b> | FBgn0003733 | tor      | -0.84 | -0.82 | 0.02 | 0.02 |
| <b>FBtr0085860</b> | FBgn0039873 | CG2191   | -0.56 | -0.55 | 0.02 | 0.02 |
| <b>FBtr0081591</b> | FBgn0037498 | CG10029  | -1.08 | -1.17 | 0.02 | 0.01 |
| <b>FBtr0072943</b> | FBgn0020509 | Acp62F   | -0.98 | -1.18 | 0.03 | 0.01 |
| <b>FBtr0072649</b> | FBgn0024277 | trio     | -0.44 | -0.56 | 0.03 | 0.00 |
| <b>FBtr0082287</b> | FBgn0037844 | CG4570   | 1.11  | 1.56  | 0.03 | 0.00 |
| <b>FBtr0071740</b> | FBgn0034663 | CG4363   | -1.72 | -1.67 | 0.03 | 0.04 |
| <b>FBtr0076020</b> | FBgn0036260 | Rh7      | -0.71 | -0.71 | 0.04 | 0.04 |
| <b>FBtr0077255</b> | FBgn0031162 | CG1819   | -1.11 | -1.29 | 0.04 | 0.02 |
| <b>FBtr0088809</b> | FBgn0033271 | CG8708   | -0.82 | -0.84 | 0.04 | 0.04 |
| <b>FBtr0082935</b> | FBgn0038230 | CG14843  | -0.56 | -0.86 | 0.04 | 0.00 |
| <b>FBtr0082068</b> | FBgn0027950 | MBD-like | 0.44  | 0.53  | 0.05 | 0.01 |
| <b>FBtr0086759</b> | FBgn0034323 | CG18537  | 0.75  | 0.99  | 0.05 | 0.01 |
| <b>FBtr0085328</b> | FBgn0039609 | CG14529  | -0.69 | -0.98 | 0.05 | 0.00 |

**Table S3. Direct targets of Cbt**

By examining the overlap of Cbt ChIP peaks (PMID: 25572844) (24) with the Cbt microarray targets shown in Table S2, we identified 86 genes that are both transcriptionally regulated by Cbt and are also associated with one or more Cbt binding peak. These genes are scored as direct Cbt targets.

| <b>Gene_ID</b>     | <b>Gene_Name</b> |  | <b>Gene_ID</b>     | <b>Gene_Name</b> |
|--------------------|------------------|--|--------------------|------------------|
| <b>FBgn0000022</b> | ac               |  | <b>FBgn0033579</b> | CG13229          |
| <b>FBgn0000121</b> | Arr2             |  | <b>FBgn0033749</b> | achi             |
| <b>FBgn0000147</b> | aur              |  | <b>FBgn0034046</b> | tun              |
| <b>FBgn0000404</b> | CycA             |  | <b>FBgn0034299</b> | CG5757           |
| <b>FBgn0000405</b> | CycB             |  | <b>FBgn0034494</b> | CG10444          |
| <b>FBgn0000536</b> | eas              |  | <b>FBgn0034614</b> | CG9752           |
| <b>FBgn0001086</b> | fzy              |  | <b>FBgn0035199</b> | CG9134           |
| <b>FBgn0001321</b> | knk              |  | <b>FBgn0035266</b> | Gk               |
| <b>FBgn0002466</b> | sti              |  | <b>FBgn0035497</b> | CG14995          |
| <b>FBgn0002638</b> | Bj1              |  | <b>FBgn0035557</b> | CG11353          |

|                    |             |  |                    |                       |
|--------------------|-------------|--|--------------------|-----------------------|
| <b>FBgn0002924</b> | ncd         |  | <b>FBgn0035612</b> | CG10625               |
| <b>FBgn0002948</b> | nod         |  | <b>FBgn0035638</b> | Tektin-C              |
| <b>FBgn0003022</b> | Ote         |  | <b>FBgn0035640</b> | mad2                  |
| <b>FBgn0003124</b> | polo        |  | <b>FBgn0036246</b> | CG17154               |
| <b>FBgn0003423</b> | slgA        |  | <b>FBgn0036978</b> | Toll-9                |
| <b>FBgn0003732</b> | Top2        |  | <b>FBgn0037633</b> | CG9839                |
| <b>FBgn0004170</b> | sc          |  | <b>FBgn0037834</b> | Art1                  |
| <b>FBgn0004618</b> | gl          |  | <b>FBgn0038394</b> | CG10264               |
| <b>FBgn0005638</b> | slbo        |  | <b>FBgn0038608</b> | WRNexo                |
| <b>FBgn0005655</b> | PCNA/mus209 |  | <b>FBgn0038632</b> | CG14301               |
| <b>FBgn0010314</b> | Cks30A      |  | <b>FBgn0038741</b> | CG17186               |
| <b>FBgn0015270</b> | Orc2        |  | <b>FBgn0038772</b> | CG4973                |
| <b>FBgn0015799</b> | Rbf         |  | <b>FBgn0038859</b> | Obp93a                |
| <b>FBgn0015929</b> | dpa         |  | <b>FBgn0039167</b> | CG17786               |
| <b>FBgn0020258</b> | ppk         |  | <b>FBgn0039594</b> | CG9990                |
| <b>FBgn0020633</b> | Mcm7        |  | <b>FBgn0039790</b> | CG2246                |
| <b>FBgn0023000</b> | mth         |  | <b>FBgn0039863</b> | CG1815                |
| <b>FBgn0023076</b> | Clk         |  | <b>FBgn0039886</b> | CG2003                |
| <b>FBgn0026876</b> | CG11403     |  | <b>FBgn0040232</b> | cmet                  |
| <b>FBgn0027949</b> | msb11       |  | <b>FBgn0040251</b> | Ugt86Di               |
| <b>FBgn0028494</b> | CG6424      |  | <b>FBgn0041181</b> | TepIII                |
| <b>FBgn0029672</b> | CG2875      |  | <b>FBgn0041607</b> | asparagine-synthetase |
| <b>FBgn0029820</b> | CG16721     |  | <b>FBgn0045035</b> | tefu                  |
| <b>FBgn0030164</b> | CG1889      |  | <b>FBgn0050035</b> | Tret1-1               |
| <b>FBgn0030170</b> | CG2990      |  | <b>FBgn0050085</b> | CG30085               |
| <b>FBgn0030646</b> | CG9203      |  | <b>FBgn0050481</b> | mRpL53                |
| <b>FBgn0030864</b> | CG8173      |  | <b>FBgn0051870</b> | CG31870               |
| <b>FBgn0031252</b> | CG13690     |  | <b>FBgn0052475</b> | mth18                 |
| <b>FBgn0031468</b> | CG2975      |  | <b>FBgn0052512</b> | CG32512               |
| <b>FBgn0032685</b> | CG10211     |  | <b>FBgn0053113</b> | Rtnl1                 |
| <b>FBgn0032889</b> | CG9331      |  | <b>FBgn0053155</b> | CG33155               |
| <b>FBgn0033048</b> | CG7881      |  | <b>FBgn0053453</b> | CG33453               |
| <b>FBgn0033443</b> | CG1698      |  | <b>FBgn0063485</b> | Lasp                  |

**Table S4. Gene ontology (GO) enrichment analysis of the direct Cbt targets**

(Cutoff: P&lt;0.05)

| GO Term    | Description                                                | Count | Adj. P value |
|------------|------------------------------------------------------------|-------|--------------|
| GO:0006261 | DNA-dependent DNA replication                              | 10    | 4.64E-06     |
| GO:0006260 | DNA replication                                            | 10    | 1.40E-05     |
| GO:1903047 | mitotic cell cycle process                                 | 17    | 1.40E-05     |
| GO:0051726 | regulation of cell cycle                                   | 15    | 1.40E-05     |
| GO:0000278 | mitotic cell cycle                                         | 18    | 1.40E-05     |
| GO:0007346 | regulation of mitotic cell cycle                           | 12    | 3.88E-05     |
| GO:0000070 | mitotic sister chromatid segregation                       | 9     | 1.45E-04     |
| GO:0007067 | mitotic nuclear division                                   | 12    | 2.12E-04     |
| GO:0007049 | cell cycle                                                 | 21    | 2.12E-04     |
| GO:0000819 | sister chromatid segregation                               | 9     | 2.69E-04     |
| GO:0022402 | cell cycle process                                         | 19    | 5.16E-04     |
| GO:0010564 | regulation of cell cycle process                           | 10    | 6.49E-04     |
| GO:0000280 | nuclear division                                           | 15    | 6.49E-04     |
| GO:0048285 | organelle fission                                          | 15    | 8.24E-04     |
| GO:0098813 | nuclear chromosome segregation                             | 10    | 8.24E-04     |
| GO:0007059 | chromosome segregation                                     | 10    | 0.001467944  |
| GO:0006259 | DNA metabolic process                                      | 11    | 0.003669937  |
| GO:0045786 | negative regulation of cell cycle                          | 8     | 0.004164179  |
| GO:0044772 | mitotic cell cycle phase transition                        | 8     | 0.005777938  |
| GO:0007056 | spindle assembly involved in female meiosis                | 4     | 0.005777938  |
| GO:0044770 | cell cycle phase transition                                | 8     | 0.006182304  |
| GO:1901990 | regulation of mitotic cell cycle phase transition          | 7     | 0.019604028  |
| GO:1901987 | regulation of cell cycle phase transition                  | 7     | 0.019604028  |
| GO:0090306 | spindle assembly involved in meiosis                       | 4     | 0.019629599  |
| GO:0006275 | regulation of DNA replication                              | 4     | 0.029790016  |
| GO:1901988 | negative regulation of cell cycle phase transition         | 6     | 0.029790016  |
| GO:1901991 | negative regulation of mitotic cell cycle phase transition | 6     | 0.029790016  |
| GO:0007052 | mitotic spindle organization                               | 5     | 0.037133223  |
| GO:0051225 | spindle assembly                                           | 5     | 0.045486586  |
| GO:0007144 | female meiosis I                                           | 3     | 0.045486586  |
| GO:0045930 | negative regulation of mitotic cell cycle                  | 6     | 0.045486586  |
| GO:0010948 | negative regulation of cell cycle process                  | 6     | 0.045486586  |
| GO:0051301 | cell division                                              | 9     | 0.049616574  |

**Table S5. Shared ChIP-binding targets of Cbt and E2F1**

By cross-comparing the Cbt ChIP-Seq data (PMID: 25572844) (24) and E2F1 ChIP-chip data (PMID: 22927638) (25), 117 shared target genes of Cbt and E2F1 were identified. Cbt peaks were assigned to 2306 genes. E2F1 peaks were assigned to 255 genes. The significance of overlap ( $p=2.007555851498559E-28$ ) was assessed by hypergeometric test.

| Gene_ID     | Gene_Name   |  | Gene_ID     | Gene_Name |
|-------------|-------------|--|-------------|-----------|
| FBgn0000015 | Abd-B       |  | FBgn0029915 | CG14434   |
| FBgn0000541 | E(bx)       |  | FBgn0030054 | Caf1-180  |
| FBgn0000662 | fl(2)d      |  | FBgn0030170 | CG2990    |
| FBgn0000721 | for         |  | FBgn0030329 | prtp      |
| FBgn0001197 | His2Av      |  | FBgn0030400 | CG11138   |
| FBgn0001297 | kay         |  | FBgn0030724 | Nipsnap   |
| FBgn0001323 | knrl        |  | FBgn0030735 | CG3632    |
| FBgn0001994 | crp         |  | FBgn0030744 | CG9992    |
| FBgn0002466 | sti         |  | FBgn0031145 | Ntf-2     |
| FBgn0002638 | Bj1         |  | FBgn0031191 | Cp110     |
| FBgn0002948 | nod         |  | FBgn0031395 | CG10874   |
| FBgn0003079 | phl         |  | FBgn0031820 | DLP       |
| FBgn0003415 | skd         |  | FBgn0032394 | CG6746    |
| FBgn0004009 | wg          |  | FBgn0032474 | DnaJ-H    |
| FBgn0004370 | Ptp10D      |  | FBgn0032682 | CG10176   |
| FBgn0004373 | fwd         |  | FBgn0032748 | CG10492   |
| FBgn0004432 | Cyp1        |  | FBgn0032886 | CG9328    |
| FBgn0004587 | B52         |  | FBgn0033609 | fbl6      |
| FBgn0004828 | His3.3B     |  | FBgn0033787 | CG13321   |
| FBgn0005612 | Sox14       |  | FBgn0033812 | Pex13     |
| FBgn0005613 | Sox15       |  | FBgn0034240 | MESR4     |
| FBgn0005624 | Psc         |  | FBgn0034500 | CG11200   |
| FBgn0005630 | lola        |  | FBgn0034987 | CG3363    |
| FBgn0005654 | lat         |  | FBgn0035357 | MEP-1     |
| FBgn0005655 | PCNA/mus209 |  | FBgn0036684 | CG3764    |
| FBgn0008654 | Su(z)2      |  | FBgn0036783 | CheA75a   |
| FBgn0010228 | HmgZ        |  | FBgn0037007 | CG5059    |
| FBgn0010379 | Akt1        |  | FBgn0037021 | CG11399   |
| FBgn0010382 | CycE        |  | FBgn0037377 | CG1218    |
| FBgn0010548 | Aldh-III    |  | FBgn0037734 | trbd      |

|                    |           |  |                    |                 |
|--------------------|-----------|--|--------------------|-----------------|
| <b>FBgn0010602</b> | lwr       |  | <b>FBgn0037834</b> | Art1            |
| <b>FBgn0010651</b> | l(2)08717 |  | <b>FBgn0038118</b> | timeout         |
| <b>FBgn0011225</b> | jar       |  | <b>FBgn0039071</b> | CG4434          |
| <b>FBgn0011327</b> | Uch-L3    |  | <b>FBgn0039659</b> | CG14506         |
| <b>FBgn0011785</b> | BRWD3     |  | <b>FBgn0040071</b> | tara            |
| <b>FBgn0015229</b> | glec      |  | <b>FBgn0040309</b> | Jafrac1         |
| <b>FBgn0015270</b> | Orc2      |  | <b>FBgn0043456</b> | CG4747          |
| <b>FBgn0015321</b> | UbcD4     |  | <b>FBgn0050085</b> | CG30085         |
| <b>FBgn0015396</b> | jumu      |  | <b>FBgn0051694</b> | CG31694         |
| <b>FBgn0015777</b> | nrv2      |  | <b>FBgn0051716</b> | Cnot4           |
| <b>FBgn0015799</b> | Rbf       |  | <b>FBgn0052103</b> | CG32103         |
| <b>FBgn0016977</b> | spen      |  | <b>FBgn0052133</b> | ptip            |
| <b>FBgn0020386</b> | Pdk1      |  | <b>FBgn0083968</b> | CG34132         |
| <b>FBgn0020496</b> | CtBP      |  | <b>FBgn0085344</b> | CG34315         |
| <b>FBgn0020503</b> | CLIP-190  |  | <b>FBgn0086655</b> | jing            |
| <b>FBgn0020633</b> | Mcm7      |  | <b>FBgn0086695</b> | hd              |
| <b>FBgn0020887</b> | Su(z)12   |  | <b>FBgn0086899</b> | tlk             |
| <b>FBgn0020912</b> | Ptx1      |  | <b>FBgn0086902</b> | kis             |
| <b>FBgn0022720</b> | zf30C     |  | <b>FBgn0250911</b> | CG42245         |
| <b>FBgn0022764</b> | Sin3A     |  | <b>FBgn0259113</b> | DNApol-alpha180 |
| <b>FBgn0022772</b> | Orc1      |  | <b>FBgn0259938</b> | cwo             |
| <b>FBgn0022893</b> | Df31      |  | <b>FBgn0260936</b> | scny            |
| <b>FBgn0023143</b> | Uba1      |  | <b>FBgn0260991</b> | Incenp          |
| <b>FBgn0025621</b> | CG16989   |  | <b>FBgn0261278</b> | grp             |
| <b>FBgn0026063</b> | KP78b     |  | <b>FBgn0261617</b> | nej             |
| <b>FBgn0026064</b> | KP78a     |  | <b>FBgn0261641</b> | CG42724         |
| <b>FBgn0027085</b> | Aats-leu  |  | <b>FBgn0263490</b> | mld             |
| <b>FBgn0028420</b> | Kr-h1     |  | <b>FBgn0264270</b> | Sxl             |
| <b>FBgn0028953</b> | CG14478   |  |                    |                 |



**Table S6. Gene ontology (GO) enrichment analysis of the shared ChIP-binding targets of Cbt and E2F1 (Cutoff:  $P < 1.00E-04$ )**

| GO Term    | Description                                                    | Count | Adj. P value |
|------------|----------------------------------------------------------------|-------|--------------|
| GO:0006261 | DNA-dependent DNA replication                                  | 12    | 1.76E-07     |
| GO:0016043 | cellular component organization                                | 61    | 1.76E-07     |
| GO:0007049 | cell cycle                                                     | 31    | 1.76E-07     |
| GO:0048731 | system development                                             | 53    | 1.76E-07     |
| GO:0031323 | regulation of cellular metabolic process                       | 44    | 1.76E-07     |
| GO:0019219 | regulation of nucleobase-containing compound metabolic process | 36    | 1.76E-07     |
| GO:0034654 | nucleobase-containing compound biosynthetic process            | 38    | 1.76E-07     |
| GO:0050794 | regulation of cellular process                                 | 63    | 1.76E-07     |
| GO:0031326 | regulation of cellular biosynthetic process                    | 37    | 1.76E-07     |
| GO:0009889 | regulation of biosynthetic process                             | 37    | 1.76E-07     |
| GO:0051171 | regulation of nitrogen compound metabolic process              | 38    | 1.86E-07     |
| GO:0019222 | regulation of metabolic process                                | 45    | 2.21E-07     |
| GO:0044767 | single-organism developmental process                          | 66    | 2.21E-07     |
| GO:1901362 | organic cyclic compound biosynthetic process                   | 39    | 2.21E-07     |
| GO:0050789 | regulation of biological process                               | 65    | 2.21E-07     |
| GO:0071840 | cellular component organization or biogenesis                  | 61    | 2.21E-07     |
| GO:0044260 | cellular macromolecule metabolic process                       | 67    | 2.27E-07     |
| GO:0006355 | regulation of transcription, DNA-templated                     | 33    | 2.27E-07     |
| GO:2001141 | regulation of RNA biosynthetic process                         | 33    | 2.27E-07     |
| GO:1903506 | regulation of nucleic acid-templated transcription             | 33    | 2.27E-07     |
| GO:0090304 | nucleic acid metabolic process                                 | 46    | 2.27E-07     |
| GO:0018130 | heterocycle biosynthetic process                               | 38    | 2.27E-07     |
| GO:0032502 | developmental process                                          | 66    | 2.37E-07     |
| GO:0019438 | aromatic compound biosynthetic process                         | 38    | 2.37E-07     |
| GO:0022402 | cell cycle process                                             | 28    | 2.37E-07     |
| GO:0051252 | regulation of RNA metabolic process                            | 34    | 2.39E-07     |
| GO:2000112 | regulation of cellular macromolecule biosynthetic process      | 35    | 2.88E-07     |
| GO:0048856 | anatomical structure development                               | 65    | 2.88E-07     |
| GO:0006351 | transcription, DNA-templated                                   | 32    | 3.03E-07     |
| GO:0010556 | regulation of macromolecule biosynthetic process               | 35    | 3.06E-07     |
| GO:0006260 | DNA replication                                                | 12    | 3.06E-07     |
| GO:0007275 | multicellular organism development                             | 60    | 3.80E-07     |
| GO:0080090 | regulation of primary metabolic process                        | 42    | 4.79E-07     |

|            |                                                             |    |          |
|------------|-------------------------------------------------------------|----|----------|
| GO:0051726 | regulation of cell cycle                                    | 18 | 8.25E-07 |
| GO:0097659 | nucleic acid-templated transcription                        | 33 | 9.62E-07 |
| GO:0032774 | RNA biosynthetic process                                    | 33 | 1.01E-06 |
| GO:0048513 | animal organ development                                    | 37 | 1.10E-06 |
| GO:0006996 | organelle organization                                      | 45 | 1.50E-06 |
| GO:0044763 | single-organism cellular process                            | 82 | 2.04E-06 |
| GO:0044237 | cellular metabolic process                                  | 75 | 2.04E-06 |
| GO:0048869 | cellular developmental process                              | 50 | 2.31E-06 |
| GO:0044707 | single-multicellular organism process                       | 62 | 2.32E-06 |
| GO:0065007 | biological regulation                                       | 66 | 2.32E-06 |
| GO:0010468 | regulation of gene expression                               | 35 | 2.56E-06 |
| GO:0060429 | epithelium development                                      | 31 | 2.56E-06 |
| GO:0043067 | regulation of programmed cell death                         | 14 | 2.86E-06 |
| GO:0009653 | anatomical structure morphogenesis                          | 42 | 4.44E-06 |
| GO:0060255 | regulation of macromolecule metabolic process               | 39 | 6.94E-06 |
| GO:0007444 | imaginal disc development                                   | 23 | 7.14E-06 |
| GO:0006325 | chromatin organization                                      | 20 | 9.01E-06 |
| GO:0034645 | cellular macromolecule biosynthetic process                 | 45 | 9.72E-06 |
| GO:0010564 | regulation of cell cycle process                            | 13 | 9.72E-06 |
| GO:0009059 | macromolecule biosynthetic process                          | 45 | 1.06E-05 |
| GO:0030154 | cell differentiation                                        | 47 | 1.06E-05 |
| GO:0009888 | tissue development                                          | 31 | 1.10E-05 |
| GO:0006139 | nucleobase-containing compound metabolic process            | 46 | 1.13E-05 |
| GO:0010941 | regulation of cell death                                    | 14 | 1.29E-05 |
| GO:0016070 | RNA metabolic process                                       | 39 | 1.63E-05 |
| GO:0006357 | regulation of transcription from RNA polymerase II promoter | 20 | 2.29E-05 |
| GO:0007346 | regulation of mitotic cell cycle                            | 13 | 2.29E-05 |
| GO:0046483 | heterocycle metabolic process                               | 46 | 2.33E-05 |
| GO:0043170 | macromolecule metabolic process                             | 68 | 2.33E-05 |
| GO:0032989 | cellular component morphogenesis                            | 26 | 2.95E-05 |
| GO:0042981 | regulation of apoptotic process                             | 12 | 3.01E-05 |
| GO:1901360 | organic cyclic compound metabolic process                   | 47 | 3.01E-05 |
| GO:0012501 | programmed cell death                                       | 16 | 3.05E-05 |
| GO:0006974 | cellular response to DNA damage stimulus                    | 15 | 3.41E-05 |
| GO:0044249 | cellular biosynthetic process                               | 49 | 3.51E-05 |
| GO:0006259 | DNA metabolic process                                       | 15 | 3.69E-05 |
| GO:0006277 | DNA amplification                                           | 6  | 4.00E-05 |
| GO:0006725 | cellular aromatic compound metabolic process                | 46 | 4.23E-05 |

|            |                                 |    |          |
|------------|---------------------------------|----|----------|
| GO:0000278 | mitotic cell cycle              | 19 | 4.42E-05 |
| GO:0033554 | cellular response to stress     | 21 | 5.14E-05 |
| GO:0044238 | primary metabolic process       | 73 | 5.18E-05 |
| GO:0051276 | chromosome organization         | 22 | 6.61E-05 |
| GO:0043412 | macromolecule modification      | 32 | 7.01E-05 |
| GO:0008219 | cell death                      | 16 | 7.25E-05 |
| GO:0007447 | imaginal disc pattern formation | 9  | 8.06E-05 |
| GO:0009058 | biosynthetic process            | 49 | 8.80E-05 |
| GO:0016477 | cell migration                  | 14 | 8.89E-05 |
| GO:0022008 | neurogenesis                    | 32 | 9.00E-05 |

## SI References

1. B. A. Hay, R. Maile, G. M. Rubin, P element insertion-dependent gene activation in the *Drosophila* eye. *Proc Natl Acad Sci U S A* **94**, 5195-5200 (1997).
2. S. A. Thacker, P. C. Bonnette, R. J. Duronio, The contribution of E2F-regulated transcription to *Drosophila* PCNA gene function. *Curr Biol* **13**, 53-58 (2003).
3. K. H. Moberg, D. W. Bell, D. C. Wahrer, D. A. Haber, I. K. Hariharan, Archipelago regulates Cyclin E levels in *Drosophila* and is mutated in human cancer cell lines. *Nature* **413**, 311-316 (2001).
4. M. V. Frolov *et al.*, Functional antagonism between E2F family members. *Genes Dev* **15**, 2146-2160 (2001).
5. L. Weng, C. Zhu, J. Xu, W. Du, Critical role of active repression by E2F and Rb proteins in endoreplication during *Drosophila* development. *EMBO J* **22**, 3865-3875 (2003).
6. S. Munoz-Descalzo, J. Terol, N. Paricio, Cabut, a C2H2 zinc finger transcription factor, is required during *Drosophila* dorsal closure downstream of JNK signaling. *Dev Biol* **287**, 168-179 (2005).
7. L. A. Buttitta, A. J. Katzaroff, C. L. Perez, A. de la Cruz, B. A. Edgar, A double-assurance mechanism controls cell cycle exit upon terminal differentiation in *Drosophila*. *Dev Cell* **12**, 631-643 (2007).
8. M. Calleja, E. Moreno, S. Pelaz, G. Morata, Visualization of gene expression in living adult *Drosophila*. *Science* **274**, 252-255 (1996).
9. T. P. Neufeld, A. F. de la Cruz, L. A. Johnston, B. A. Edgar, Coordination of growth and cell division in the *Drosophila* wing. *Cell* **93**, 1183-1193 (1998).
10. H. Jiang *et al.*, Cytokine/Jak/Stat signaling mediates regeneration and homeostasis in the *Drosophila* midgut. *Cell* **137**, 1343-1355 (2009).
11. M. V. Frolov, N. S. Moon, N. J. Dyson, dDP is needed for normal cell proliferation. *Mol Cell Biol* **25**, 3027-3039 (2005).

12. R. J. Duronio, P. H. O'Farrell, J. E. Xie, A. Brook, N. Dyson, The transcription factor E2F is required for S phase during *Drosophila* embryogenesis. *Genes Dev* **9**, 1445-1455 (1995).
13. P. Zhang *et al.*, A Balance of Yki/Sd Activator and E2F1/Sd Repressor Complexes Controls Cell Survival and Affects Organ Size. *Dev Cell* **43**, 603-617 e605 (2017).
14. P. Zhang *et al.*, An SH3PX1-Dependent Endocytosis-Autophagy Network Restrains Intestinal Stem Cell Proliferation by Counteracting EGFR-ERK Signaling. *Dev Cell* **49**, 574-589 e575 (2019).
15. S. A. Blythe, E. F. Wieschaus, Establishment and maintenance of heritable chromatin structure during early *Drosophila* embryogenesis. *Elife* **5** (2016).
16. N. Zielke *et al.*, Fly-FUCCI: A versatile tool for studying cell proliferation in complex tissues. *Cell Rep* **7**, 588-598 (2014).
17. I. Rodriguez, *Drosophila* TIEG Is a Modulator of Different Signalling Pathways Involved in Wing Patterning and Cell Proliferation. *PLoS One* **6**, e18418 (2011).
18. L. A. Buttitta, A. J. Katzaroff, B. A. Edgar, A robust cell cycle control mechanism limits E2F-induced proliferation of terminally differentiated cells in vivo. *J Cell Biol* **189**, 981-996 (2010).
19. T. Lee, L. Luo, Mosaic analysis with a repressible cell marker (MARCM) for *Drosophila* neural development. *Trends Neurosci* **24**, 251-254 (2001).
20. M. Joe Song, C. C. Hong, Y. Zhang, L. Buttitta, B. A. Edgar, Comparative Generalized Logic Modeling Reveals Differential Gene Interactions during Cell Cycle Exit in *Drosophila* Wing Development. *GI Ed Proc* **157**, 143-152 (2009).
21. N. Reeves, J. W. Posakony, Genetic programs activated by proneural proteins in the developing *Drosophila* PNS. *Dev Cell* **8**, 413-425 (2005).
22. V. G. Tusher, R. Tibshirani, G. Chu, Significance analysis of microarrays applied to the ionizing radiation response. *Proc Natl Acad Sci U S A* **98**, 5116-5121 (2001).
23. A. Sturn, J. Quackenbush, Z. Trajanoski, Genesis: cluster analysis of microarray data. *Bioinformatics* **18**, 207-208 (2002).
24. M. Ruiz-Romero, E. Blanco, N. Paricio, F. Serras, M. Corominas, Cabut/dTIEG associates with the transcription factor Yorkie for growth control. *EMBO Rep* **16**, 362-369 (2015).
25. M. Korenjak, E. Anderssen, S. Ramaswamy, J. R. Whetstine, N. J. Dyson, RBF binding to both canonical E2F targets and noncanonical targets depends on functional dE2F/dDP complexes. *Mol Cell Biol* **32**, 4375-4387 (2012).
